# 1                   **Transcription factor SmWRKY1 positively promote the** 2                   **biosynthesis of tanshinones in *Salvia miltiorrhiza***

3  
4  
5   Wenzhi Cao<sup>1,†</sup>, Yao Wang<sup>1,†</sup>, Min Shi<sup>1</sup>, Xiaolong Hao<sup>1</sup>, Weiwei Zhao<sup>1</sup>, Yu Wang<sup>1</sup>, Jie  
6   Ren<sup>1</sup> and Guoyin Kai<sup>1,2,\*</sup>

7  
8  
9  
10   <sup>1</sup>Institute of Plant Biotechnology, Development Center of Plant Germplasm Resources,  
11   College of Life and Environment Sciences, Shanghai Normal University, Shanghai  
12   200234, People's Republic of China;

13   <sup>2</sup>College of pharmacy, Zhejiang Chinese Medical University, Hangzhou, Zhejiang,  
14   310053, People's Republic of China.

15  
16  


---

17   <sup>†</sup>Co-first authors; <sup>\*</sup>To whom correspondence should be addressed.

18   Prof. Dr. Guoyin Kai, Institute of Plant Biotechnology, Development Center of Plant  
19   Germplasm Resources, College of Life and Environment Sciences, Shanghai Normal

20 University, Shanghai 200234, P. R. China. Tel/Fax: +86-21-64321291, E-mail:  
21 kaiguoyin@163.com; guoyinkai@yahoo.com

22

23

24

## 25 **Abstract**

26 Tanshinones, one group of bioactive diterpenes, were widely used in the treatment of  
27 cardiovascular diseases. WRKYs play important roles in plant metabolism, but their  
28 regulation mechanism in *S. miltiorrhiza* remains elusive. In this study, one *WRKY*  
29 transcription factor *SmWRKY1* was isolated and characterized from *S. miltiorrhiza*.  
30 Multiple sequence alignment and phylogenetic tree analysis showed *SmWRKY1*  
31 shared high homology with other plant WRKYs such as *CrWRKY1*. *SmWRKY1* were  
32 predominantly expressed in leaves and stems, and was responsive to salicylic acid  
33 (SA), methyl jasmonate (MeJA) and nitric oxide (NO) treatment. Subcellular  
34 localization analysis found that *SmWRKY1* was localized in the nucleus.  
35 Over-expression of *SmWRKY1* significantly elevated the transcripts of genes involved  
36 in MEP pathway especially 1-deoxy-D-xylulose 5-phosphate synthase (*SmDXS*) and  
37 1-deoxy-D-xylulose 5-phosphate reductoisomerase (*SmDXR*), resulted in over 6 folds  
38 increase in tanshinones production in transgenic lines (up to 13.731mg/g dry weight  
39 (DW)) compared with the control lines. Dual-luciferase (Dual-LUC) assay showed  
40 that *SmWRKY1* can positively regulate *SmDXR* expression by binding to its promoter.  
41 Our work revealed that *SmWRKY1* participated in the regulation of tanshinones  
42 biosynthesis and acted as a positive regulator through activating *SmDXR* in the MEP  
43 pathway, thus discloses a new insight to further excavate the regulation mechanism of

44 tanshinones biosynthesis.

45

46 **Keywords:** *Salvia miltiorrhiza*; hairy roots; *SmWRKY1*; MEP pathway; tanshinones;  
47 metabolic engineering

48

49

50

51

52

53

## 54 **Introduction**

55 *Salvia miltiorrhiza* Bunge, belonging to the *Lamiaceae* family, is a famous and  
56 prevalent Chinese herbal plant that has been widely used for the treatment of  
57 cardiovascular and cerebrovascular diseases (Zhang et al., 2010; Kai et al., 2011). The  
58 abietane-type diterpenes in *S. miltiorrhiza* are the liposoluble tanshinones including  
59 dihydrotanshinone, tanshinone I, tanshinone IIA and cryptotanshinone, which exert a  
60 variety of biological activities such as antioxidant, heart-protection, antibacterial and  
61 antitumor (Zhang et al., 2011; Chen et al., 2012; Gong et al., 2012; Xu et al., 2010,  
62 2015). However, serious quality decrease and the low content of tanshinones in  
63 cultivated *S. miltiorrhiza* greatly limited the increasing market need (Hao et al. 2015;  
64 Zhou et al., 2016a). Therefore, it is important to improve the content of tanshinones  
65 by genetic engineering, which relies on deep understanding of the tanshinone  
66 biosynthetic pathway to *S. miltiorrhiza* (Liao et al., 2009; Zhou et al., 2016a).  
67 Tanshinones derived from the terpenoids metabolism including the mevalonate (MVA)

68 pathway and the 2-C-methyl-d-erythritol-4-phosphate (MEP) pathway, both consisted  
69 of a series of complex enzyme catalytic reactions while operated in separate  
70 subcellular compartments, the MVA pathway localized in the cytosol and the MEP  
71 pathway took place in plastids (Kai et al., 2011; Shi et al., 2016a). Isopentenyl  
72 pyrophosphate (IPP) and its isomer dimethylallyl pyrophosphate (DMAPP) from the  
73 MEP pathway are the universal C5 precursors of tanshinones, therefore, tanshinone  
74 are generally considered to be mainly derived from the MEP pathway (Ge and Wu,  
75 2005; Yan et al., 2009; Kai et al., 2011; Zhou et al., 2016). Recently, several key genes  
76 including 3-hydroxy-3-methylglutaryl CoA reductase (HMGR),  
77 1-deoxy-D-xylulose-5-phosphate reductoisomerase (DXR),  
78 1-deoxy-D-xylulose-5-phosphate synthase (DXS), geranylgeranyl diphosphate  
79 synthase (GGPPS), copalyl diphosphate synthase (CPS), kaurene synthase (KS),  
80 multiradiene oxidase (CYP76AH1) have been successfully cloned and characterized  
81 from *S. miltiorrhiza* (Liao et al., 2009; Yan et al., 2009; Kai et al., 2010; Ma et al.,  
82 2012; Shi et al., 2014; Gao et al., 2009; Guo et al., 2013; Zhou et al., 2016a).  
83 Clarification of the above key genes involved in the tanshinones biosynthetic pathway  
84 enabled us to produce elevated concentration of tanshinones in *S. miltiorrhiza* through  
85 genetic engineering by manipulating one or several regulation points in either MVA or  
86 MEP pathway (Kai et al., 2011; Shi et al., 2014; Shi et al., 2016a). Co-expression of  
87 *SmHMGR* and *SmGGPPS* increased tanshinone production significantly in a  
88 transgenic *S. miltiorrhiza* hairy root line HG9 (Kai et al., 2011). In addition,  
89 introduction of *SmHMGR* and *SmDXR* into *S. miltiorrhiza* hairy roots enhanced the  
90 content of tanshinones apparently (Shi et al., 2014). Simultaneous introduction of  
91 *SmGGPPS* and *SmDXSII* into *S. miltiorrhiza* hairy root significantly improved the  
92 production of tanshinones, besides, their expression in *Arabidopsis thaliana* plants  
93 increased production of carotenoids, gibberellins and chlorophyll in contrast to the  
94 non-transgenic lines (Shi et al., 2016a).

95 Apart from manipulation of pivotal catalytic steps in the biosynthetic process of

96 tanshinones, regulation of transcription factors such as MYB and bHLH transcription  
97 factor family was also considered as a feasible strategy to mine the biosynthesis  
98 mechanism of tanshinones (Zhou et al., 2016; Zhang et al., 2017). Heterologous  
99 expression of maize transcription factor C1 in *S. miltiorrhiza* hairy roots elevated the  
100 accumulation of tanshinones through direct interaction of C1 with its recognition  
101 sequences of pathway genes, especially mevalonate-5-diphosphate-decarboxylase  
102 (*SmMDC*) and 5-phosphomevalonate kinase (*SmPMK*) to upregulate their expression  
103 levels (Zhao et al., 2015). RNA interference (RNAi) of *SmMYC2a/b* affected multiple  
104 genes in tanshinone biosynthetic pathway and led to a reduction of tanshinones  
105 contents, implying that *SmMYC2a/b* may be a positive regulator of tanshinones  
106 accumulation (Zhou et al., 2016b). Overexpression of a *S. miltiorrhiza* R2R3-MYB  
107 gene *SmMYB9b* resulted in a 2.2-fold enhancement of tanshinones accumulation in  
108 danshen hairy roots over the control (Zhang et al., 2017). However, less is known  
109 about WRKY transcription factors and their regulation mechanism in *S. miltiorrhiza*  
110 (Li et al., 2015).

111 Salicylic acid (SA) is a kind of import plant hormone signal in plant metabolism,  
112 which is also reported that it could induce the accumulation of tanshinone as  
113 reported before (Hao et al., 2015), but its regulation mechanism is not clear yet.  
114 WRKY transcription factors form one of the largest gene families unique to plants,  
115 which are involved in plant secondary metabolism (Suttipanta et al., 2011). The first  
116 WRKY gene named *SPF1*, was identified from sweet potato (Ishiguro and Nakamura,  
117 1994). Subsequently, much attention has been paid to identify and analyze WRKY  
118 genes from different model and crop plants, for instance *Arabidopsis* (Eulgem et al.,  
119 2000; Kalde et al., 2003; Wang et al., 2011), soybean (*Glycine max*) (Yin et al., 2013),  
120 *tobacco* (Yoda et al., 2002), rice (*Oryza sativa*) (Wu et al., 2005) and so on.  
121 Meanwhile, WRKY has been isolated from some traditional herbal plants including  
122 *Artemisia annua*, *Coptis japonica* and *Catharanthus roseus* (Jiang et al., 2015; Chen  
123 et al., 2017; Kato et al., 2007; Suttipanta et al., 2011). The significant feature of

WRKY transcription factor is their WRKY domain which is approximately 60-amino acid long with the highly conserved amino acid sequence WRKYGQK located at the N-terminal and a non-typical zinc-finger-like motif C2HC (C-X<sub>7</sub>-C-X<sub>23</sub>-H-X<sub>1</sub>-C) or C2H2(C-X<sub>4-5</sub>-C-X<sub>22-23</sub>-H-X<sub>1</sub>-H) at the C-terminus (Xu et al., 2004; Lu et al., 2015). WRKY proteins can bind to the W-box cis-elements (T)TGAC(C/T) in the promoter region of some defense-related genes (Xu et al., 2004; Rushton et al., 2010; Liu et al., 2016). WRKY transcription factors can be separated into three sub-groups in accordance with the number of specific WRKY domains and zinc-finger-like motifs, Group I contains two WRKY domains and C2H2 motif, Groups II has one WRKY domain and C2H2 motif and Group III possesses one WRKY domain and C2HC motif (Eulgem et al., 2000; Rushton et al., 2010). WRKYs have shown many different functions on multiple physiology activities including stress defense, trichome development and secondary metabolism (Jiang et al., 2016). For example, *Gossypium arboreum* WRKY1 (GaWRKY1) was found to participate in regulation of sesquiterpene biosynthesis in cotton by regulate the target gene (+)-delta-cadinene synthase (CAD1) (Xu et al., 2004). *C. roseus* WRKY1 (CrWRKY1) bound to the W-box elements of the tryptophan decarboxylase (TDC) promoter involved in terpenoid indole alkaloid (TIA) biosynthetic pathway and accumulated up to 3-fold higher levels of serpentine compared with control hairy roots (Suttipanta et al., 2011). The WRKY transcription factor *GLANDULAR TRICHOME-SPECIFIC WRKY 1* (*AaGSWI*) positively regulated the expression of *AaCYP71AV1* and *AaORA* by conjunction to the W-box motifs in their promoters (Chen et al., 2017). *Glycine max* WRKY27 responsive to various abiotic stresses interacted with GmMYB174, and then cooperatively inhibited *GmNAC29* expression, facilitating stress-tolerance of drought and cold in soybean (Wang et al., 2015). A WRKY transcription factor from *W. somnifera* bound to the W-box region in the promoters of squalene synthase and squalene epoxidase, regulating the accumulation of triterpenoids in *W. somnifera* including phytosterols and withanolides (Singh et al., 2017). However, functional

152 WRKYs related to secondary metabolism of tanshinones or salvianolic acids in *S.*  
153 *miltiorrhiza* have not been reported.

154 In this study, a WRKY transcription factor has been isolated from *S. miltiorrhiza*  
155 (named as *SmWRKY1*) and functionally characterized. Phylogenetic analysis showed  
156 that it shared high homology with AtWRKY70, CrWRKY1 and GaWRKY1. Multiple  
157 sequence alignment revealed that the nucleus-localized *SmWRKY1* contained one  
158 WRKY domain, with conserved amino acid sequence WRKYGQK and a C2HC type  
159 zinc-finger-like motif, therefore it can be classified into group III WRKY transcription  
160 factors. Introduction of *SmWRKY1* into *S. miltiorrhiza* hairy roots improved the  
161 transcripts of *SmDXS* and *SmDXR* involved in MEP pathway, resulting in higher level  
162 of tanshinones in transgenic lines compared with the control lines (2.175mg/g DW).  
163 The highest content of tanshinones was detected in *SmWRKY1*-3 at 13.731mg/g DW,  
164 which was 5.3 folds higher than the control. Dual-LUC assay revealed that *SmWRKY1*  
165 activated the expression of *SmDXR* by binding to the promotor region containing one  
166 w-box in vivo. Taken together, our work revealed that *SmWRKY1* positively elevated  
167 the accumulation of tanshinones, which provides a new insight to further excavate the  
168 regulation mechanism of tanshinones biosynthesis.

169

## 170 **Materials and Methods**

### 171 **Plant samples and reagents**

172 *S. miltiorrhiza* seedlings used for *Agrobacterium*-mediated transformation were  
173 cultivated in Murashige and Skoog (MS) medium (pH5.8) containing 3% sugar and  
174 0.8% agar in the greenhouse, growth conditions were as follows: 16 h: 8 h, light: dark  
175 cycle under 25°C with 60% relative air humidity as reported before (Kai et al., 2011;  
176 Shi et al., 2014, 2016a). Seeds of *N. benthamiana* were sown and cultivated in the  
177 pots supplemented with soil matrix for 4-5 weeks for infiltration (Zhou et al., 2016a).

178 All strains (*Escherichia coli* DH5 $\alpha$ , *Agrobacterium* C58C1, GV3101 and ASE) and  
179 plasmid vectors (*pCAMBIA2300*, *pMON530*) used in this paper were preserved in our  
180 laboratory. The intermediate cloning vector *pMD-18T* and reverse transcriptase  
181 M-MLV were purchased from TaKaRa Biotechnology Co., Ltd.  
182 Primers-synthesizing and DNA sequencing were performed by Shanghai Sangon  
183 Biotechnological Company, China. RNA extraction kit and qRT-PCR kit were  
184 purchased from Tiangen Company. Standards of cryptotanshinone, tanshinone I,  
185 tanshinone IIA, dihydrotanshinone used for HPLC analysis were purchased from  
186 Aladdin, China. MJ, SA and SNP used for elicitation treatments were purchased from  
187 Sigma-Aldrich, Sinopharm Chemical Reagent Co., Ltd, respectively.

#### 188 **Elicitor preparation**

189 For methyl jasmonate (MeJA) induction, MeJA was dissolved in 5% ethanol, and then  
190 dissolved into distilled water to a storage concentration of 50 mM. A final working  
191 concentration of 100  $\mu$ M MeJA was employed for elicitation assay, and equivalent  
192 volume of sterilized water was used as the mock treatment (Kai et al., 2012).  
193 For salicylic acid (SA) treatment, SA was dissolved in sterile water to a storage  
194 concentration of 50 mM, and then added to hairy roots cultures to the final  
195 concentration of 100  $\mu$ M (Hao et al., 2015). For NO elicitation, first a concentration  
196 of 100 mM SNP solution was obtained, and then applied to cultures to 100  $\mu$ M. All  
197 the above-mentioned solutions were sterilized through 0.22 $\mu$ m filters (Pall  
198 Corporation, USA). And solvent of the equivalent volume was added into the control  
199 group.

#### 200 **Identification and cloning of *SmWRKY1***

201 A local transcription database of *S. miltiorrhiza* built up as reported previously (Shi et  
202 al., 2016b) was used for this research. One partial *WRKY* in high homology with other  
203 plants *WRKYs* while lack of 3'-terminal was chosen for further study. Gene-specific

204 forward primer *SmWRKYI*-F605 was designed to amplify the 3' end of *SmWRKYI* as  
 205 well as the reverse primer AUAP by rapid amplification of cDNA ends (RACE) (Liao  
 206 et al., 2009; Kai et al., 2010; Zhang et al., 2011). 5'-sequence and 3'-terminal  
 207 products was aligned and assembled to obtain the full-length cDNA sequence of the  
 208 putative *SmWRKYI* gene. Primer pairs *SmWRKYI*-KF and *SmWRKYI*-KR were  
 209 synthesized for amplification of the full ORF of *SmWRKYI* according to the  
 210 procedure as described below: initial denaturation at 94 °C for 10 min, 35 cycles of  
 211 94 °C for 45 s, 55 °C for 45 s and 72 °C for 90 s, followed by a final extension at  
 212 72 °C for 10 min. All primers used for identification of *SmWRKYI* were listed in  
 213 Supplemental Table 1.

## 214 **Bioinformatics analysis of *SmWRKYI***

215 Biological characteristics of *SmWRKYI* were further analyzed by a series of tools.  
 216 Nucleotide blast, protein blast and ORF Finder were used to analyze nucleotide  
 217 sequence and complete open reading frame. MEGA 6 was applied to construct a  
 218 phylogenetic tree by the neighbor-joining (NJ) method and 1000 replications were  
 219 performed for bootstrap values. Multiple sequences alignment between *SmWRKYI*  
 220 and other plant *WRKYs* were carried out using Clustal X with default parameters (Shi  
 221 et al., 2016b; Zhou et al., 2016a).

## 222 **Expression pattern of *SmWRKYI* in different tissues and under various elicitors** 223 **treatments**

224 Different tissues including taproot, stem, leaf, flower and seed were gathered from  
 225 two-year-old *S. miltiorrhiza* plants in mature. Elicitor treatments were conducted on *S.*  
 226 *miltiorrhiza* hairy roots sub-cultured for 60 days infected with *Agrobacterium* C58C1.  
 227 Hairy roots were harvested at selected time points (0h, 0.5h, 1h, 2h and 4h) after MJ  
 228 treatment. And for SA and NO induction, hairy roots were collected at 0h, 3h, 4h, 6h,  
 229 9h, 12h after treatment. All the treated samples were immediately frozen in liquid

230 nitrogen and stored for analyzing the expression profiles of *SmWRKY1*.

# 231 **Subcellular localization of *SmWRKY1***

232 To analyze the subcellular localization of *SmWRKY1*, PCR products of *SmWRKY1*  
233 ORF with *Bgl*III and *Kpn*I restriction sites were digested with *Bgl*III and *Kpn*I and  
234 cloned into the vector *pMON530* to generate the vector *pMON530-SmWRKY1-GFP*.  
235 The constructed expression vector was transferred into *Agrobacterium* strain ASE and  
236 injected into forty-day-old tobacco leaves. GFP fluorescence was observed after 48h  
237 cultivation using the confocal microscope (Carl Zeiss) (Shi et al., 2016b; Zhou et al.,  
238 2016a).

# 239 **Generation of transgenic *SmWRKY1* hairy roots**

240 The full-length coding sequence of *SmWRKY1* with restriction sites *Spe* I and *Bst*EII  
241 was cloned and inserted into modified *pCAMBIA2300<sup>sm</sup>* vector (replace the small  
242 fragment digested by *Eco*R I and *Hind* III with the corresponding *GFP-GUSA* gene  
243 expression cassette from *pCAMBIA1304*) under the control of the CaMV 35S  
244 promoter to generate *pCAMBIA2300<sup>sm</sup>-SmWRKY1* as described before (Shi et al.,  
245 2016b). *A. rhizogenes* strain C58C1 containing *pCAMBIA2300<sup>sm</sup>-SmWRKY1* was used  
246 to infect the aseptically explants and the empty *pCAMBIA2300<sup>sm</sup>* was regarded as the  
247 control. The transformation procedure was the same as our previous study (Kai et al.,  
248 2011; Shi et al., 2014, 2016a, 2016b; Zhou et al., 2016a). Hairy roots in good state  
249 were sub-cultured and primer pairs *CaMV35S-F23* and *SmWRKY1-QR* were used to  
250 identify the positive colony by polymerase chain reaction (PCR) analysis, meanwhile  
251 *rolB* gene in C58C1 was detected. Genomic DNA was isolated from individual hairy  
252 root sample by the cetyltrimethyl ammonium bromide method as previously reported  
253 (Zhou et al., 2016a, c). Identified positive-colonies were segmented approximately 4 cm  
254 long for shake-flask culture in 100 mL 1/2MS medium and cultured at 25°C on an  
255 orbital shaker shaking at the speed of 100 rpm in darkness (Shi et al., 2016a, 2016b).  
256 Primers sequences were listed in Supplemental Table 1.

## 257 **Total RNA isolation and relative expression analysis via qRT-PCR**

258 Expression profiles of *SmWRKY1* and several key enzyme genes involved in  
 259 tanshinones biosynthetic pathway were investigated by real-time quantitative PCR  
 260 analysis (qRT-PCR). Total RNA was extracted from different tissues with the RNA  
 261 prep pure plant kit as described before (Shi et al., 2016b). Total RNA served as the  
 262 template for reverse transcription (RT) reaction, the reaction conditions were  
 263 according to our previous study (Shi et al., 2016b). Gene-specific primers (listed in  
 264 Supplemental Table 1) for qRT-PCR were designed and analyzed the relative  
 265 expression level compared with the internal reference gene *SmActin* using the relative  
 266 quantitative analysis method ( $2^{-\Delta\Delta CT}$ ). Amplifications were performed according to  
 267 the manufacturer's instructions: one cycle of denaturation at 95 °C for 10 min, then 40  
 268 cycles of 15 s denaturation at 95 °C, 30 s annealing at 60 °C and 30 s extension at  
 269 72 °C.

## 270 **Dual-Luciferase (Dual-LUC) assay**

271 For the dual-luciferase (Dual-LUC) assay, the promoters of *SmDXR* and *SmDXS2*  
 272 with *KpnI* and *XhoI* restriction sites were cloned into pGREEN 0800 to drive the  
 273 luciferase reporters, respectively. And the complete ORF of *SmWRKY1* was inserted  
 274 into the *pCAMBIA2300<sup>sm</sup>* vector as effector. The *pCAMBIA2300<sup>sm</sup>-SmWRKY1* and  
 275 *pCAMBIA2300<sup>sm</sup>* empty plasmid were transferred into *Agrobacterium tumefaciens*  
 276 strain GV3101 individually. The *pGREEN-pSmDXR*, *pGREEN-pSmDXS2* was each  
 277 co-transformed with the helper plasmid pSoup19 into GV3101, and the assay was  
 278 conducted as described before (Zhang et al., 2015). The *pCAMBIA2300<sup>sm</sup>* empty  
 279 plasmid was used as a negative control. The 35S promoter-driven Renilla was taken  
 280 as an internal control. Each sample were measured for three biological times. The  
 281 reporter strain with effector strain was mixed with ratio of one-to-one to inject the  
 282 tobacco leaves. After two days' injection, the samples were collected for dual-LUC  
 283 assay by reaction reagents according to the manufacturer (Promega).

## 284 **Tanshinones analysis**

285 The 60-day-old hairy roots were dried at 50 °C to constant weight in an oven.  
286 Approximate 200 mg dried hairy roots were ground into powder and immersed in 16  
287 mL methanol/dichloromethane (3:1, v/v) for tanshinones extraction. Tanshinones  
288 extraction was carried as reported before (Hao et al., 2015). HPLC analysis was  
289 performed on Agilent 1260 apparatus equipped with a Waters reversed-phase C18  
290 symmetry column, and the detection conditions were performed following the  
291 methods described previously (Shi et al., 2016b).

## 292 **Results**

### 293 **Isolation and molecular cloning of *SmWRKY1***

294 WRKY transcription factor is a large family in plants which has been proven to be  
295 involved in the regulation of many physiological processes in plants including  
296 secondary metabolism (Xu et al., 2004; Suttipanta et al., 2011). By searching our local  
297 transcriptome database, a *WKRY* fragment with 5' untranslated region (UTR) but lack  
298 of partial of 3' terminal sequence was chosen for further research because it showed  
299 high homology with *GaWRKY1* and *CrWRKY1* as well as *Arabidopsis thaliana*  
300 *WKRY70*. 3' RACE technology was used to obtain a 432 bp sequence of 3' end of the  
301 fragment. After sequence assembly, the full-length gene was cloned and designated it  
302 as *SmWRKY1*. *SmWRKY1* sequence consists of 17 bp 5'UTR, a complete 789 bp open  
303 reading frame which encodes 262 amino acids, along with 238 bp 3' UTR.

### 304 **Bioinformatics analysis of *SmWRKY1***

305 To further figure out the biological characteristics and phylogenetic relationship of  
306 *SmWRKY1*, a series of bioinformatics analysis were performed. Multiple alignment of  
307 *SmWRKY1* with related WRKY proteins from other plant species revealed that  
308 *SmWRKY1*, *AaWRKY1* and *CrWRKY1* all contained a conserved WRKY domain  
309 (WRKYGQK) and a special zinc finger like motif in its C-terminal which falls into

the group III of WRKY family (**Fig. 1A**) and indicated that they might have similar function. Then alignment of SmWRKY1 and other plant WRKYs was performed at amino acid level and a neighbor-joining tree was constructed, as shown in (**Fig. 1B**). The results revealed that SmWRKY1 shared 62%, 49%, 37%, 29% identities with EgWRKY70, NtWRKY70, CrWRKY1 and AaWRKY1, respectively.

### 315 **Tissue and induction expression profiles of *SmWRKY1***

To investigate the tissue expression pattern of *SmWRKY1*, roots, stems, leaves, flowers and seeds from two-year-old *S. miltiorrhiza* plants were analyzed. *SmWRKY1* showed significant expression in leaves and stems and low expression in flower and root, its transcript was barely detected in seeds (**Fig. 2A**). This result indicated that *SmWRKY1* was not a tissue-constitutive expression gene.

To study whether *SmWRKY1* could respond to exogenous hormone treatment, 60-day-old *S. miltiorrhiza* hairy roots were treated with MeJA for different time points while the 0 hr point was used as control and the expression was detected by qRT-PCR. The result indicated that *SmWRKY1* expression was induced by exogenous MeJA (**Fig. 2B**), the expression level reached peak at 0.5h after treatment, arising approximate 3-fold compared with control). Then, the transcript level of *SmWRKY1* declined rapidly in two hours. Meanwhile, the hairy roots were also treated with SA and NO. Both SA and NO could induce the expression of *SmWRKY1*, which reached the maximum level at 3h and gradually decreased till 12h after treatment (**Fig. 2C, D**). In summary, *SmWRKY1* could be induced by MeJA, SA and NO.

### 331 **Subcellular localization of *SmWRKY1***

To experimentally confirm the subcellular localization of *SmWRKY1*, *SmWRKY1* was cloned into the *pMON530* vector to fuse with green fluorescent protein (GFP) reporter gene to generate vector *pMON530-SmWRKY1-GFP*. Then, the constructed vector and the *pMON530* (used as the control) was transformed into ASE strain and expressed in

336 tobacco leaves, respectively. In the leaves of control vector transformed plant, the  
337 fluorescence of GFP was detected in the cytoplasm and nucleus (**Fig. 3**). On the  
338 contrast, the fluorescent signal of *SmWRKY1*-fused GFP was only examined in  
339 nucleus. The expression pattern was consistent with the character of *SmWRKY1* as a  
340 transcription factor.

#### 341 **Acquisition of *SmWRKY1* transgenic hairy roots**

342 To further investigate the function of *SmWRKY1* in *S. miltiorrhiza*, we inserted  
343 *SmWRKY1* into a modified *pCAMBIA2300<sup>sm</sup>* vector. Then, the recombinant  
344 overexpression vector *pCAMBIA2300<sup>sm</sup>-SmWRKY1* was introduced into *A.rhizogenes*  
345 stain C58C1 and used to infect *S. miltiorrhiza* explants and the empty vector  
346 *pCAMBIA2300<sup>sm</sup>* was used as control. After 2-3 weeks the fresh hairy roots  
347 differentiated from the stem and leaf explant as shown in **Fig. 4**. The positive lines  
348 carrying *SmWRKY1* gene were verified by PCR. The positive rate was 20.5% among  
349 the 39 samples (**Fig. 5**). qRT-PCR analysis of the expression of *SmWRKY1* in  
350 over-expression lines found that *SmWRKY1* expressed 20- to 48-fold higher than the  
351 empty vector control transformed lines (**Fig. 6A**). The three high expression lines  
352 including 1, 2 and 32 (designated as 3) were chosen for further analysis.

#### 353 ***SmDXS* and *SmDXR* involved in MEP pathway were up-regulated by *SmWRKY1***

354 To study whether *SmWRKY1* participated in the regulation of tanshinone biosynthesis,  
355 transcript levels of several genes related to tanshinones biosynthesis in *SmWRKY1*  
356 transgenic hairy root were analyzed by qRT-PCR. Several tanshione biosynthesis  
357 pathway genes were up-regulated in the *SmWRKY1*-overexpressing hairy roots (**Fig.**  
358 **6B**), the most striking ones were *SmDXS2* and *SmDXR* gene, which increased 4-6  
359 folds and 4-10 folds compared with the control, respectively. Though the expression  
360 of *SmIPPI*, *SmGGPPS*, *SmCPS*, *SmKSL* and *SmCYP76AH1* was a little lower than  
361 *SmDXS* and *SmDXR*, their expression in over-expression lines was 2-4 folds higher

362 than the control. In contrast, the expression of all these seven tanshinones biosynthesis  
363 pathway genes were significantly decreased in the knock-down lines. All these results  
364 suggested that *SmWRKY1* may be a positive regulator in tanshinones biosynthesis.

### 365 ***SmWRKY1* activates the transcription of *SmDXR* in vivo**

366 Expression profiles showed that *SmWRKY1* significantly promote the expression of  
367 *SmDXR* and *SmDXS2* in charge of pivotal catalytic steps of tanshinone accumulation.  
368 By analyzing the sequence of *SmDXR* and *SmDXS2* promoter, we found a W-box in  
369 the promoter of *SmDXR* (**Fig. 7A**). Then dual luciferase (dual-LUC) method was  
370 employed to verify whether *SmWRKY1* protein activates the transcription of *SmDXR*  
371 and *SmDXS2* or not. The results showed that *SmWRKY1* elevated the expression of  
372 *SmDXR* by 6.08-fold (**Fig. 7B**) while endowed inconspicuous change.

### 373 **Accumulation of tanshinone was obviously affected by *SmWRKY1***

374 Based on the quantitative data, we wanted to further evaluate whether the expression  
375 of *SmWRKY1* in transgenic hairy roots affect the content of tanshinone. Three  
376 overexpression lines and two knock-down line were used to examine four monomers  
377 of tanshinone including cryptotanshinone, dihydrotanshinone I, tanshinone I,  
378 tanshinone IIA in hairy roots by HPLC. The results showed that the content of  
379 cryptotanshinone, dihydrotanshinone I, tanshinone I were significantly up-regulated  
380 and the total tanshinone had risen to 9.443-13.731mg/g DW in over expression lines.  
381 Among them *pCambia2300<sup>sm</sup>-SmWRKY1-3* lines accumulated the highest content of  
382 total tanshinone, which was 6.31 folds higher than control (**Fig 8**). These results  
383 further confirmed the positive role of *SmWRKY1* in the regulation of tanshinone  
384 biosynthesis.

385

### 386 **Discussion**

WRKY transcription factors are one of the largest gene families specific to plants which have been studied for decades. The conserved domain WRKYGQK and a zinc finger motif which consists of 60 amino acids are considered as the general character of WRKY TFs which also can be regarded as the criterion for subgrouping (Eulgem et al., 2000; Xie et al., 2005; Zhang and Wang, 2005). *SPF1*, *ABF1.2*, *PcWRKY1.2.3* and *ZAP1* are the first WRKY cDNAs isolated from sweet potato (*Ipomoea batatas*), wild oat (*Avena fatua*), parsley (*Petroselinum crispum*) and *Arabidopsis*, respectively (Ishiguro et al., 1994; Rushton et al., 1996; de Pater, S. et al. 1996). Up to now, 74 and 109 WRKYs members have been found in *Arabidopsis* and *Oryza sativa* respectively (Ujjal et al., 2016). Previous studies have proved that WRKY TFs could directly bind to the W-box of related genes from different signal pathways and played its regulatory role in stress tolerance in plants (Eulgem et al., 2000). For instance, *SpWRKY1* has been testified to promote resistance to *Phytophthora nicotianae* and tolerance to salt and drought stress in transgenic tobacco (Li et al., 2015). *GhWRKY25* from cotton, a member of group I, conferred transgenic *Nicotiana benthamiana* differential tolerance to abiotic and biotic stresses (Liu et al., 2016). In recent years, the role of WRKY TFs in the regulation of secondary metabolism in plants has gained attentions, and some progress has been made in this field, for example, the involvement of *Artemisia annua* WRKY1 (AaWRKY1) transcription factor can elevate the production of artemisinin by targeting the Amorpha-4,11-diene synthase (ADS) gene of *Artemisia annua* (Ma et al., 2009; Jiang et al., 2016). A jasmonate- and salicin-inducible WRKY transcription factor from *Withania somnifera* named as *WsWRKY1* could bind to W-box sequences in promoters of squalene synthase and squalene epoxidase genes in *W. somnifera* genes regarding triterpenoid biosynthesis such as phytosterol and withanolides (Singh et al., 2017). The WRKY transcription factor *GLANDULAR TRICHOME-SPECIFIC WRKY 1* (AaGSWI) positively regulated the expression of *AaCYP71AV1* and *AaORA* by conjunction to the W-box motifs in their promoters (Chen et al., 2017). However, lack of research on the

415 function of WRKY TFs in *S. miltiorrhiza* especially in the regulation of tanshinone  
416 biosynthesis were reported.

417 *S. miltiorrhiza*, a traditional Chinese herbal medicine, has been used for thousands of  
418 years. Previous studies have proved that as a major medicinal active ingredient in *S.*  
419 *miltiorrhiza*, tanshinones could be used for the treatment of cardiovascular and  
420 cerebrovascular diseases in China (Chen et al., 2012). However, traditional *S.*  
421 *miltiorrhiza* production cannot meet the growing clinical needs due to its slow growth,  
422 low tanshinone content and scarcity of wild resources (Zhou et al., 2016a). Thus,  
423 genetic engineering has become an effective and important way to increase the  
424 accumulation of active ingredients in *S. miltiorrhiza*. Overexpression of *SmDXS* in  
425 transgenic hairy root lines can significantly enhance the production of tanshinones  
426 (Zhou et al., 2016a). Meanwhile *SmDXR* was also an important enzyme gene in  
427 tanshinone biosynthetic pathway whose overexpression could significantly improve  
428 the production of tanshinones in hairy root lines (Shi et al., 2014). In our study, a new  
429 WRKY transcription factor was successfully cloned from *S. miltiorrhiza* with high  
430 homology with *CrWRKY1* and *GaWRKY1*. qRT-PCR analysis showed that  
431 over-expression of *SmWRKY1* can promote the transcripts level of *SmDXR* and  
432 *SmDXS2* to the greatest extent in comparison to other genes involved in tanshinone  
433 biosynthetic pathway such as *SmIPPI*, *SmGGPPS*, *SmCPS*, *SmKSL* and  
434 *SmCYP76AH1*. Otherwise, dual-Luciferase (Dual-LUC) assay showed that *SmWRKY1*  
435 can positively regulate *SmDXR* expression by directly binding to the promoter region  
436 containing one W-box. HPLC analysis revealed that introduction of *SmWRKY1* in  
437 transgenic *S. miltiorrhiza* hairy roots can increase the tanshinones production up to  
438 13.731mg/g dry weight (DW) which is over 6 folds as that in non-transgenic lines.  
439 Therefore, it is an effective strategy to regulate the tanshinone production in *S.*  
440 *miltiorrhiza* by introduction of related transcription factors.

441 To our knowledge, the defense mechanisms in plants are complicated and are mainly  
442 considered to be regulated by SA and MJ signaling network (Tsuda et al., 2009). SA

443 plays a vital role in plant defense against pathogens and pathogen invasion obviously  
 444 triggers its accumulation in plants (Qiu et al., 2009). MeJA is widely used as an  
 445 elicitor to investigate the biosynthetic pathway of active compounds and the  
 446 underlying regulatory mechanisms (Gundlach et al., 1992). It has been proved to be  
 447 defensive to environmental stresses such as wounding, pathogen and pest attack,  
 448 ozone exposure, ultraviolet radiation and salt stress as a regulator (Ma et al., 2006;  
 449 Wang et al., 2011). While in *S. miltiorrhiza*, exogenous MeJA treatment can promote  
 450 the accumulation of tanshinone (Gu et al., 2012; Kai et al., 2012; Hao et al., 2015). In  
 451 our study, we noticed that *SmWRKY1* can be induced by exogenous MeJA treatment,  
 452 reaching a maximal level at 0.5 h after MeJA treatment., which is consistent with the  
 453 previous reports that MeJA treatment could increase tanshione production (Hao et al.,  
 454 2015; Zhou et al., 2017). Recent studies showed that *Brassica napus* WRKY33  
 455 (BnWRKY33), a *S. sclerotiorum*-responsive gene, could positively regulate resistance  
 456 to *S. sclerotiorum* by enhancing the expression of genes involved in camalexin  
 457 synthesis and genes regulated by salicylic acid (SA) and jasmonic acid (JA) (Liu et al.,  
 458 2017). JcWRKY a salicylic acid-inducible TF was able to work in co-ordination  
 459 with SA signaling to orchestrate the different biochemical and molecular pathways to  
 460 manœuvre salt stress tolerance of the transgenic tabacoo plants (Agarwal et al., 2016).  
 461 Expression profiles revealed that the *SmWRKY1* was responsive to both SA and MJ,  
 462 which implied that *SmWRKY1* may participate in the process of stress regulation  
 463 such as the defense against pathogen, however need to be examined furthermore.

464 In conclusion, our work revealed a new transcription factor *SmWRKY1* which is  
 465 involved in the regulation of tanshinone biosynthesis and promote the accumulation  
 466 of tanshinone in transgenic hairy root lines by targeting *SmDXR* involved in the MEP  
 467 pathway. Our study may provide a new insight by genetic engineering strategy with  
 468 functional transcription factors to improve the yield of target compounds in *S.*  
 469 *miltiorrhiza*.

470

## 471 **Acknowledgments**

472 This work was supported by National Natural Science Fund (31270007, 81522049,  
473 31571735), Zhejiang Provincial Key University Project on the Construction of  
474 First-class Subjects, New Century Talent Project (NECT-13-0902), Shanghai Science  
475 and Technology Committee Project (17JC1404300, 15430502700), the “Dawn”  
476 Program of Shanghai Education Commission (16SG38) and Shanghai Engineering  
477 Research Center of Plant Germplasm Resources (17DZ2252700).

478

## 479 **References**

480 **Agarwal P, Dabi M, Sapara KK, Joshi PS, Agarwal PK.** 2016. Ectopic Expression  
481 of JcWRKY Transcription Factor Confers Salinity Tolerance via Salicylic Acid  
482 Signaling. *Front Plant Sci* 7:1541. doi:10.3389/fpls.2016.01541.

483 **Chen J, Shi DY, Liu SL, Zhong L.** 2012. Tanshinone IIA induces growth inhibition  
484 and apoptosis in gastric cancer in vitro and in vivo. *Oncol Rep* 27 (2):523-528.  
485 doi:10.3892/or.2011.1524.

486 **Chen M, Yan T, Shen Q, et al.** 2017. GLANDULAR TRICHOME-SPECIFIC  
487 WRKY 1 promotes artemisinin biosynthesis in *Artemisia annua*. *New Phytol* 214  
488 (1):304-316. doi:10.1111/nph.14373.

489 **de Pater S, Greco V, Pham K, Memelink J, Kijne J.** 1996. Characterization of a  
490 zinc-dependent transcriptional activator from *Arabidopsis*. *Nucleic Acids Res* 24  
491 (23):4624-4631.

492 **Eulgem T, Rushton PJ, Robatzek S, Somssich IE.** 2000. The WRKY superfamily of  
493 plant transcription factors. *Trends Plant Sci* 5 (5):199-206.

494 **Gao W, Hillwig ML, Huang L, Cui G, Wang X, Kong J, Yang B, Peters RJ.** 2009.

- 495 A functional genomics approach to tanshinone biosynthesis provides stereochemical  
496 insights. *Org Lett* 11 (22):5170-5173. doi:10.1021/ol902051v.
- 497 **Ge X, Wu J.** 2005. Induction and potentiation of diterpenoid tanshinone  
498 accumulation in *Salvia miltiorrhiza* hairy roots by beta-aminobutyric acid. *Appl*  
499 *Microbiol Biotechnol* 68 (2):183-188. doi:10.1007/s00253-004-1873-2.
- 500 **Gong Y, Li Y, Abdolmaleky HM, Li L, Zhou JR.** 2012. Tanshinones inhibit the  
501 growth of breast cancer cells through epigenetic modification of Aurora A expression  
502 and function. *PLoS One* 7 (4):e33656. doi:10.1371/journal.pone.0033656.
- 503 **Gu XC, Chen JF, Xiao Y, Di P, Xuan HJ, Zhou X, Zhang L, Chen WS.** 2012.  
504 Overexpression of allene oxide cyclase promoted tanshinone/phenolic acid production  
505 in *Salvia miltiorrhiza*. *Plant Cell Rep* 31 (12):2247-2259.  
506 doi:10.1007/s00299-012-1334-9.
- 507 **Gundlach H, Muller MJ, Kutchan TM, Zenk MH.** 1992. Jasmonic acid is a signal  
508 transducer in elicitor-induced plant cell cultures. *Proc Natl Acad Sci U S A* 89  
509 (6):2389-2393.
- 510 **Guo J, Zhou YJ, Hillwig ML, et al.** 2013. CYP76AH1 catalyzes turnover of  
511 multiradiene in tanshinones biosynthesis and enables heterologous production of  
512 ferruginol in yeasts. *Proc Natl Acad Sci U S A* 110 (29):12108-12113.  
513 doi:10.1073/pnas.1218061110.
- 514 **Hao X, Shi M, Cui L, Xu C, Zhang Y, Kai G.** 2015. Effects of methyl jasmonate  
515 and salicylic acid on tanshinone production and biosynthetic gene expression in  
516 transgenic *Salvia miltiorrhiza* hairy roots. *Biotechnol Appl Biochem* 62 (1):24-31.  
517 doi:10.1002/bab.1236.
- 518 **Ishiguro S, Nakamura K.** 1994. Characterization of a cDNA encoding a novel  
519 DNA-binding protein, SPF1, that recognizes SP8 sequences in the 5' upstream regions

520 of genes coding for sporamin and beta-amylase from sweet potato. Mol Gen Genet  
521 244 (6):563-571.

522 **Jiang W, Fu X, Pan Q, et al.** 2016. Overexpression of AaWRKY1 Leads to an  
523 Enhanced Content of Artemisinin in *Artemisia annua*. Biomed Res Int 2016:7314971.  
524 doi:10.1155/2016/7314971.

525 **Jiang W, Wu J, Zhang Y, Yin L, Lu J.** 2015. Isolation of a WRKY30 gene from  
526 *Muscadinia rotundifolia* (Michx) and validation of its function under biotic and  
527 abiotic stresses. Protoplasma 252 (5):1361-1374. doi:10.1007/s00709-015-0769-6.

528 **Kai G, Xu H, Zhou C, Liao P, Xiao J, Luo X, You L, Zhang L.** 2011. Metabolic  
529 engineering tanshinone biosynthetic pathway in *Salvia miltiorrhiza* hairy root cultures.  
530 Metab Eng 13 (3):319-327. doi:10.1016/j.ymben.2011.02.003.

531 **Kai GY, Liao P, Xu H, Wang J, Zhou CC, Zhou W, Qi YP, Xiao JB, Wang YL,**  
532 **Zhang L.** 2012. Molecular mechanism of elicitor-induced tanshinone accumulation in  
533 *Salvia miltiorrhiza* hairy root cultures. Acta Physiol Plant 34 (4):1421-1433.

534 **Kai GY, Liao P, Zhang T, Zhou W, Wang J, Xu H, Liu YY, Zhang L.** 2010.  
535 Characterization, Expression Profiling, and Functional Identification of a Gene  
536 Encoding Geranylgeranyl Diphosphate Synthase from *Salvia miltiorrhiza*. Biotechnol  
537 Bioproc E 15 (2):236-245.

538 **Kalde M, Barth M, Somssich IE, Lippok B.** 2003. Members of the *Arabidopsis*  
539 WRKY group III transcription factors are part of different plant defense signaling  
540 pathways. Mol Plant Microbe Interact 16 (4):295-305.  
541 doi:10.1094/MPMI.2003.16.4.295.

542 **Kato N, Dubouzet E, Kokabu Y, Yoshida S, Taniguchi Y, Dubouzet JG, Yazaki K,**  
543 **Sato F.** 2007. Identification of a WRKY protein as a transcriptional regulator of  
544 benzyloisoquinoline alkaloid biosynthesis in *Coptis japonica*. Plant Cell Physiol 48

545 (1):8-18. doi:10.1093/pcp/pcl041.

546 **Li JB, Luan YS, Liu Z.** 2015. Overexpression of SpWRKY1 promotes resistance to  
547 *Phytophthora nicotianae* and tolerance to salt and drought stress in transgenic tobacco.  
548 *Physiol Plant* 155 (3):248-266. doi:10.1111/ppl.12315.

549 **Liao P, Zhou W, Zhang L, Wang J, Yan XM, Zhang Y, Zhang R, Li L, Zhou GY,**  
550 **Kai GY.** 2009 Molecular cloning, characterization and expression analysis of a new  
551 gene encoding 3-hydroxy-3-methylglutaryl coenzyme A reductase from *Salvia*  
552 *miltiorrhiza*. *Acta Physiol Plant* 31 (3):565-572.

553 **Liu Q, Liu Y, Tang Y, Chen J, Ding W.** 2017. Overexpression of NtWRKY50  
554 Increases Resistance to *Ralstonia solanacearum* and Alters Salicylic Acid and  
555 Jasmonic Acid Production in Tobacco. *Front Plant Sci* 8:1710.  
556 doi:10.3389/fpls.2017.01710.

557 **Liu X, Song Y, Xing F, Wang N, Wen F, Zhu C.** 2016. GhWRKY25, a group I  
558 WRKY gene from cotton, confers differential tolerance to abiotic and biotic stresses  
559 in transgenic *Nicotiana benthamiana*. *Protoplasma* 253 (5):1265-1281.  
560 doi:10.1007/s00709-015-0885-3.

561 **Lu M, Wang LF, Du XH, Yu YK, Pan JB, Nan ZJ, Han J, Wang WX, Zhang QZ,**  
562 **Sun QP.** 2015. Molecular cloning and expression analysis of jasmonic acid dependent  
563 but salicylic acid independent LeWRKY1. *Genetics and Molecular Research* 14  
564 (4):15390-15398.

565 **Ma D, Pu G, Lei C, et al.** 2009. Isolation and characterization of AaWRKY1, an  
566 *Artemisia annua* transcription factor that regulates the amorpha-4,11-diene synthase  
567 gene, a key gene of artemisinin biosynthesis. *Plant Cell Physiol* 50 (12):2146-2161.  
568 doi:10.1093/pcp/pcp149.

569 **Ma S, Gong Q, Bohnert HJ.** 2006. Dissecting salt stress pathways. *J Exp Bot* 57

570 (5):1097-1107. doi:10.1093/jxb/erj098.

571 **Ma Y, Yuan L, Wu B, Li X, Chen S, Lu S.** 2012. Genome-wide identification and  
572 characterization of novel genes involved in terpenoid biosynthesis in *Salvia*  
573 *multiorrhiza*. J Exp Bot 63 (7):2809-2823. doi:10.1093/jxb/err466.

574 **Phukan UJ, Jeena GS, Shukla RK.** 2016. WRKY Transcription Factors: Molecular  
575 Regulation and Stress Responses in Plants. Front Plant Sci 7:760.  
576 doi:10.3389/fpls.2016.00760.

577 **Qiu D, Xiao J, Ding X, Xiong M, Cai M, Cao Y, Li X, Xu C, Wang S.** 2007.  
578 OsWRKY13 mediates rice disease resistance by regulating defense-related genes in  
579 salicylate- and jasmonate-dependent signaling. Mol Plant Microbe Interact 20  
580 (5):492-499. doi:10.1094/MPMI-20-5-0492.

581 **Rushton PJ, Somssich IE, Ringler P, Shen QJ.** 2010. WRKY transcription factors.  
582 Trends Plant Sci 15 (5):247-258. doi:10.1016/j.tplants.2010.02.006.

583 **Rushton PJ, Torres JT, Parniske M, Wernert P, Hahlbrock K, Somssich IE.** 1996.  
584 Interaction of elicitor-induced DNA-binding proteins with elicitor response elements  
585 in the promoters of parsley PR1 genes. EMBO J 15 (20):5690-5700.

586 **Shi M, Luo X, Ju G, Li L, Huang S, Zhang T, Wang H, Kai G.** 2016a. Enhanced  
587 Diterpene Tanshinone Accumulation and Bioactivity of Transgenic *Salvia multiorrhiza*  
588 Hairy Roots by Pathway Engineering. J Agric Food Chem 64 (12):2523-2530.  
589 doi:10.1021/acs.jafc.5b04697.

590 **Shi M, Luo X, Ju G, Yu X, Hao X, Huang Q, Xiao J, Cui L, Kai G.** 2014.  
591 Increased accumulation of the cardio-cerebrovascular disease treatment drug  
592 tanshinone in *Salvia multiorrhiza* hairy roots by the enzymes  
593 3-hydroxy-3-methylglutaryl CoA reductase and 1-deoxy-D-xylulose 5-phosphate  
594 reductoisomerase. Funct Integr Genomics 14 (3):603-615.

595 doi:10.1007/s10142-014-0385-0.

596 **Shi M, Zhou W, Zhang J, Huang S, Wang H, Kai G.** 2016b. Methyl jasmonate  
597 induction of tanshinone biosynthesis in *Salvia miltiorrhiza* hairy roots is mediated by  
598 JASMONATE ZIM-DOMAIN repressor proteins. *Sci Rep* 6:20919.  
599 doi:10.1038/srep20919.

600 **Singh AK, Kumar SR, Dwivedi V, Rai A, Pal S, Shasany AK, Nagegowda DA.**  
601 2017. A WRKY transcription factor from *Withania somnifera* regulates triterpenoid  
602 withanolide accumulation and biotic stress tolerance through modulation of  
603 phytosterol and defense pathways. *New Phytol* 215 (3):1115-1131.  
604 doi:10.1111/nph.14663.

605 **Suttipanta N, Pattanaik S, Kulshrestha M, Patra B, Singh SK, Yuan L.** 2011. The  
606 transcription factor CrWRKY1 positively regulates the terpenoid indole alkaloid  
607 biosynthesis in *Catharanthus roseus*. *Plant Physiol* 157 (4):2081-2093.  
608 doi:10.1104/pp.111.181834.

609 **Tsuda K, Sato M, Stoddard T, Glazebrook J, Katagiri F.** 2009. Network properties  
610 of robust immunity in plants. *PLoS Genet* 5 (12):e1000772.  
611 doi:10.1371/journal.pgen.1000772.

612 **Wang F, Chen HW, Li QT, et al.** 2015. GmWRKY27 interacts with GmMYB174 to  
613 reduce expression of GmNAC29 for stress tolerance in soybean plants. *Plant J* 83  
614 (2):224-236. doi:10.1111/tpj.12879.

615 **Wang Q, Wang M, Zhang X, Hao B, Kaushik SK, Pan Y.** 2011. WRKY gene  
616 family evolution in *Arabidopsis thaliana*. *Genetica* 139 (8):973-983.  
617 doi:10.1007/s10709-011-9599-4.

618 **Wu KL, Guo ZJ, Wang HH, Li J.** 2005. The WRKY family of transcription factors  
619 in rice and *Arabidopsis* and their origins. *DNA Res* 12 (1):9-26.

- 620 **Xie Z, Zhang ZL, Zou X, Huang J, Ruas P, Thompson D, Shen QJ.** 2005.  
621 Annotations and functional analyses of the rice WRKY gene superfamily reveal  
622 positive and negative regulators of abscisic acid signaling in aleurone cells. *Plant*  
623 *Physiol* 137 (1):176-189. doi:10.1104/pp.104.054312.
- 624 **Xu H, Zhang L, Zhou CC, Xiao JB, Liao P, Kai GY.** 2010. Metabolic regulation  
625 and genetic engineering of pharmaceutical component tanshinone biosynthesis in  
626 *Salvia miltiorrhiza*. *J Med Plants Res* 4 (24):2591-2597.
- 627 **Xu M, Hao H, Jiang L, Long F, Wei Y, Ji H, Sun B, Peng Y, Wang G, Ju W, Li P.**  
628 2015. In vitro inhibitory effects of ethanol extract of Danshen (*Salvia miltiorrhiza*)  
629 and its components on the catalytic activity of soluble epoxide hydrolase.  
630 *Phytomedicine* 22 (4):444-451. doi:10.1016/j.phymed.2015.02.001.
- 631 **Xu YH, Wang JW, Wang S, Wang JY, Chen XY.** 2004. Characterization of  
632 GaWRKY1, a cotton transcription factor that regulates the sesquiterpene synthase  
633 gene (+)-delta-cadinene synthase-A. *Plant Physiol* 135 (1):507-515.  
634 doi:10.1104/pp.104.038612.
- 635 **Yan XM, Zhang L, Wang J, Liao P, Zhang Y, Zhang R, Kai GY.** 2009. Molecular  
636 characterization and expression of 1-deoxy-d-xylulose 5-phosphate reductoisomerase  
637 (DXR) gene from *Salvia miltiorrhiza*. *Acta Physiol Plant* 31 (5):1015-1022.
- 638 **Yin G, Xu H, Xiao S, Qin Y, Li Y, Yan Y, Hu Y.** 2013. The large soybean (*Glycine*  
639 *max*) WRKY TF family expanded by segmental duplication events and subsequent  
640 divergent selection among subgroups. *BMC Plant Biol* 13:148.  
641 doi:10.1186/1471-2229-13-148.
- 642 **Yoda H, Ogawa M, Yamaguchi Y, Koizumi N, Kusano T, Sano H.** 2002.  
643 Identification of early-responsive genes associated with the hypersensitive response to  
644 tobacco mosaic virus and characterization of a WRKY-type transcription factor in  
645 tobacco plants. *Mol Genet Genomics* 267 (2):154-161.

doi:10.1007/s00438-002-0651-z.

**Zhang G, Tian Y, Zhang J, Shu L, Yang S, Wang W, Sheng J, Dong Y, Chen W.** 2015. Hybrid de novo genome assembly of the Chinese herbal plant danshen (*Salvia miltiorrhiza* Bunge). Gigascience 4:62. doi:10.1186/s13742-015-0104-3.

**Zhang J, Zhou L, Zheng X, Zhang J, Yang L, Tan R, Zhao S.** 2017. Overexpression of SmMYB9b enhances tanshinone concentration in *Salvia miltiorrhiza* hairy roots. Plant Cell Rep 36 (8):1297-1309. doi:10.1007/s00299-017-2154-8.

**Zhang L, Yan XM, Wang J, Li SS, Liao P, Kai GY.** 2011. Molecular cloning and expression analysis of a new putative gene encoding 3-hydroxy-3-methylglutaryl-CoA synthase from *Salvia miltiorrhiza*. Acta Physiol Plant 33 (3):953-961.

**Zhang Y, Li X, Wang Z.** 2010. Antioxidant activities of leaf extract of *Salvia miltiorrhiza* Bunge and related phenolic constituents. Food Chem Toxicol 48 (10):2656-2662. doi:10.1016/j.fct.2010.06.036.

**Zhang Y, Wang L.** 2005. The WRKY transcription factor superfamily: its origin in eukaryotes and expansion in plants. BMC Evol Biol 5:1. doi:10.1186/1471-2148-5-1.

**Zhao S, Zhang J, Tan R, Yang L, Zheng X.** 2015. Enhancing diterpenoid concentration in *Salvia miltiorrhiza* hairy roots through pathway engineering with maize C1 transcription factor. J Exp Bot 66 (22):7211-7226. doi:10.1093/jxb/erv418.

**Zhou W, Jiang YR, Zhang W, Xu GF, Rong JK.** 2013. Characterization of Large Chromosome Segment Introgressions from *Triticum turgidum* subsp dicoccoides into Bread Wheat with Simple Sequence Repeat Markers. Crop Sci 53 (4):1555-1565.

**Zhou W, Huang F, Li S, Wang Y, Zhou C, Shi M, Wang J, Chen Y, Wang Y, Wang H, Kai G.** 2016a. Molecular cloning and characterization of two 1-deoxy-d-xylulose-5-phosphate synthase genes involved in tanshinone biosynthesis

671 in *Salvia miltiorrhiza*. MolBreeding 36(9):124, DOI:10.1007/s11032-016-0550-3.

672 **Zhou Y, Sun W, Chen J, et al.** 2016b. SmMYC2a and SmMYC2b played similar but  
673 irreplaceable roles in regulating the biosynthesis of tanshinones and phenolic acids in  
674 *Salvia miltiorrhiza*. Sci Rep 6:22852. doi:10.1038/srep22852.

675 **Zhou W, Wu S, Ding M, Li J, Shi Z, Wei W, Guo JL, Zhang H, Jiang YR, Rong**  
676 **JK.** 2016c. Mapping of Ppd-B1, a major candidate gene for late heading on wild  
677 emmer chromosome arm 2bs and assessment of its interactions with early heading  
678 QTLs on 3AL. PLoS ONE 11(2): e0147377. doi:10.1371/journal.pone.0147377.

679 **Zhou W, Huang Q, Wu X, Zhou Z, Ding M, Shi M, Huang F, Li S, Wang Y, Kai**  
680 **G.** 2017. Comprehensive transcriptome profiling of *Salvia miltiorrhiza* for discovery  
681 of genes associated with the biosynthesis of tanshinones and phenolic acids. Sci Rep 7  
682 (1):10554. doi:10.1038/s41598-017-10215-2.

683

684

685

686

687

688

689

690

691

692

693

694

695

696

697

## 698 **Figure legends**

699 **Figure 1 (A)** Multiple alignment of *SmWRKY1* with related WRKY proteins from  
700 other plant species. Black boxes indicate identical residues; grey boxes indicate  
701 identical residues for at least three of the sequences. **(B)** Phylogenetic tree analysis of  
702 *SmWRKY1* and WRKY TFs from *Arabidopsis thaliana*, *Artemisia annua*,  
703 *Catharanthus roseus*, *Nicotiana tabacum*, etc. Phylogenetic tree was constructed on  
704 MEGA6.0 by using neighbor-joining method and the bootstrap values were obtained  
705 for 1000 replications.

706 **Figure 2 (A)** Expression pattern of *SmWRKY1* in different tissues. Each tissue was  
707 obtained from several individual two-year-old *S. miltiorrhiza* plants in nature.  
708 Transcript abundance of *SmWRKY1* is normalized to actin by the method of  $2^{-\Delta\Delta C_t}$ . **(B)**  
709 The expression level of *SmWRKY1* after MeJA treatment for different time points by  
710 qRT-PCR analysis respectively. **(C)** The expression level of *SmWRKY1* after SA  
711 treatment for different time points by qRT-PCR analysis respectively. **(D)** The  
712 expression level of *SmWRKY1* after NO treatment for selected points by qRT-PCR  
713 analysis respectively.

714 **Figure 3** Subcellular localization of *SmWRKY1*. **(A-D)** The free GFP expressed in *N.*  
715 *benthamiana* leaves. **(E-H)** *SmWRKY1::GFP* expressed in *N. benthamiana* leaves.

716 **Figure 4** Generation of transgenic hairy root of *S. miltiorrhiza*. **(A)** *S. miltiorrhiza*

717 explants on 1/2MS medium; **(B)**The growing hairy root on the infected *S. miltiorrhiza*  
718 explants. **(C)** Monoclone of hairy root. **(D)** Hairy roots culture in 1/2MS medium.

719 **Figure 5** **(A)** Identification of positive transgenic hairy root lines by PCR. (*GusA*-F  
720 and *GusA*-R were used to identify empty vector *pCAMBIA2300*<sup>sm</sup> transformed lines  
721 **(B)** Primers *CaMV35S*-F23 and *SmWRKYI*-QR were used to identify the positive  
722 colony of *SmWRKYI* overexpression transgenic lines).

723 **Figure 6** Transcript levels of *SmWRKYI* and genes related to tanshinones biosynthesis  
724 in *SmWRKYI* transgenic hairy roots. Expression of *SmWRKYI* were analyzed by  
725 qRT-PCR.

726 **Figure 7** The *SmDXR* promoter was fused to the luciferase (LUC) reporter and the  
727 promoter activity was determined by a transient dual-LUC assay in tobacco. The  
728 value of LUC activity/ Renilla (REN) luciferase was regarded as the activating  
729 activity. Error bars indicate SD (n = 3). Student's t-test: \*, P < 0.05; \*\*, P < 0.01

730 **Figure 8** The production of tanshinone in *SmWRKYI* transgenic hairy roots compared  
731 with control detected by HPLC.

732

733

734

735

736

A

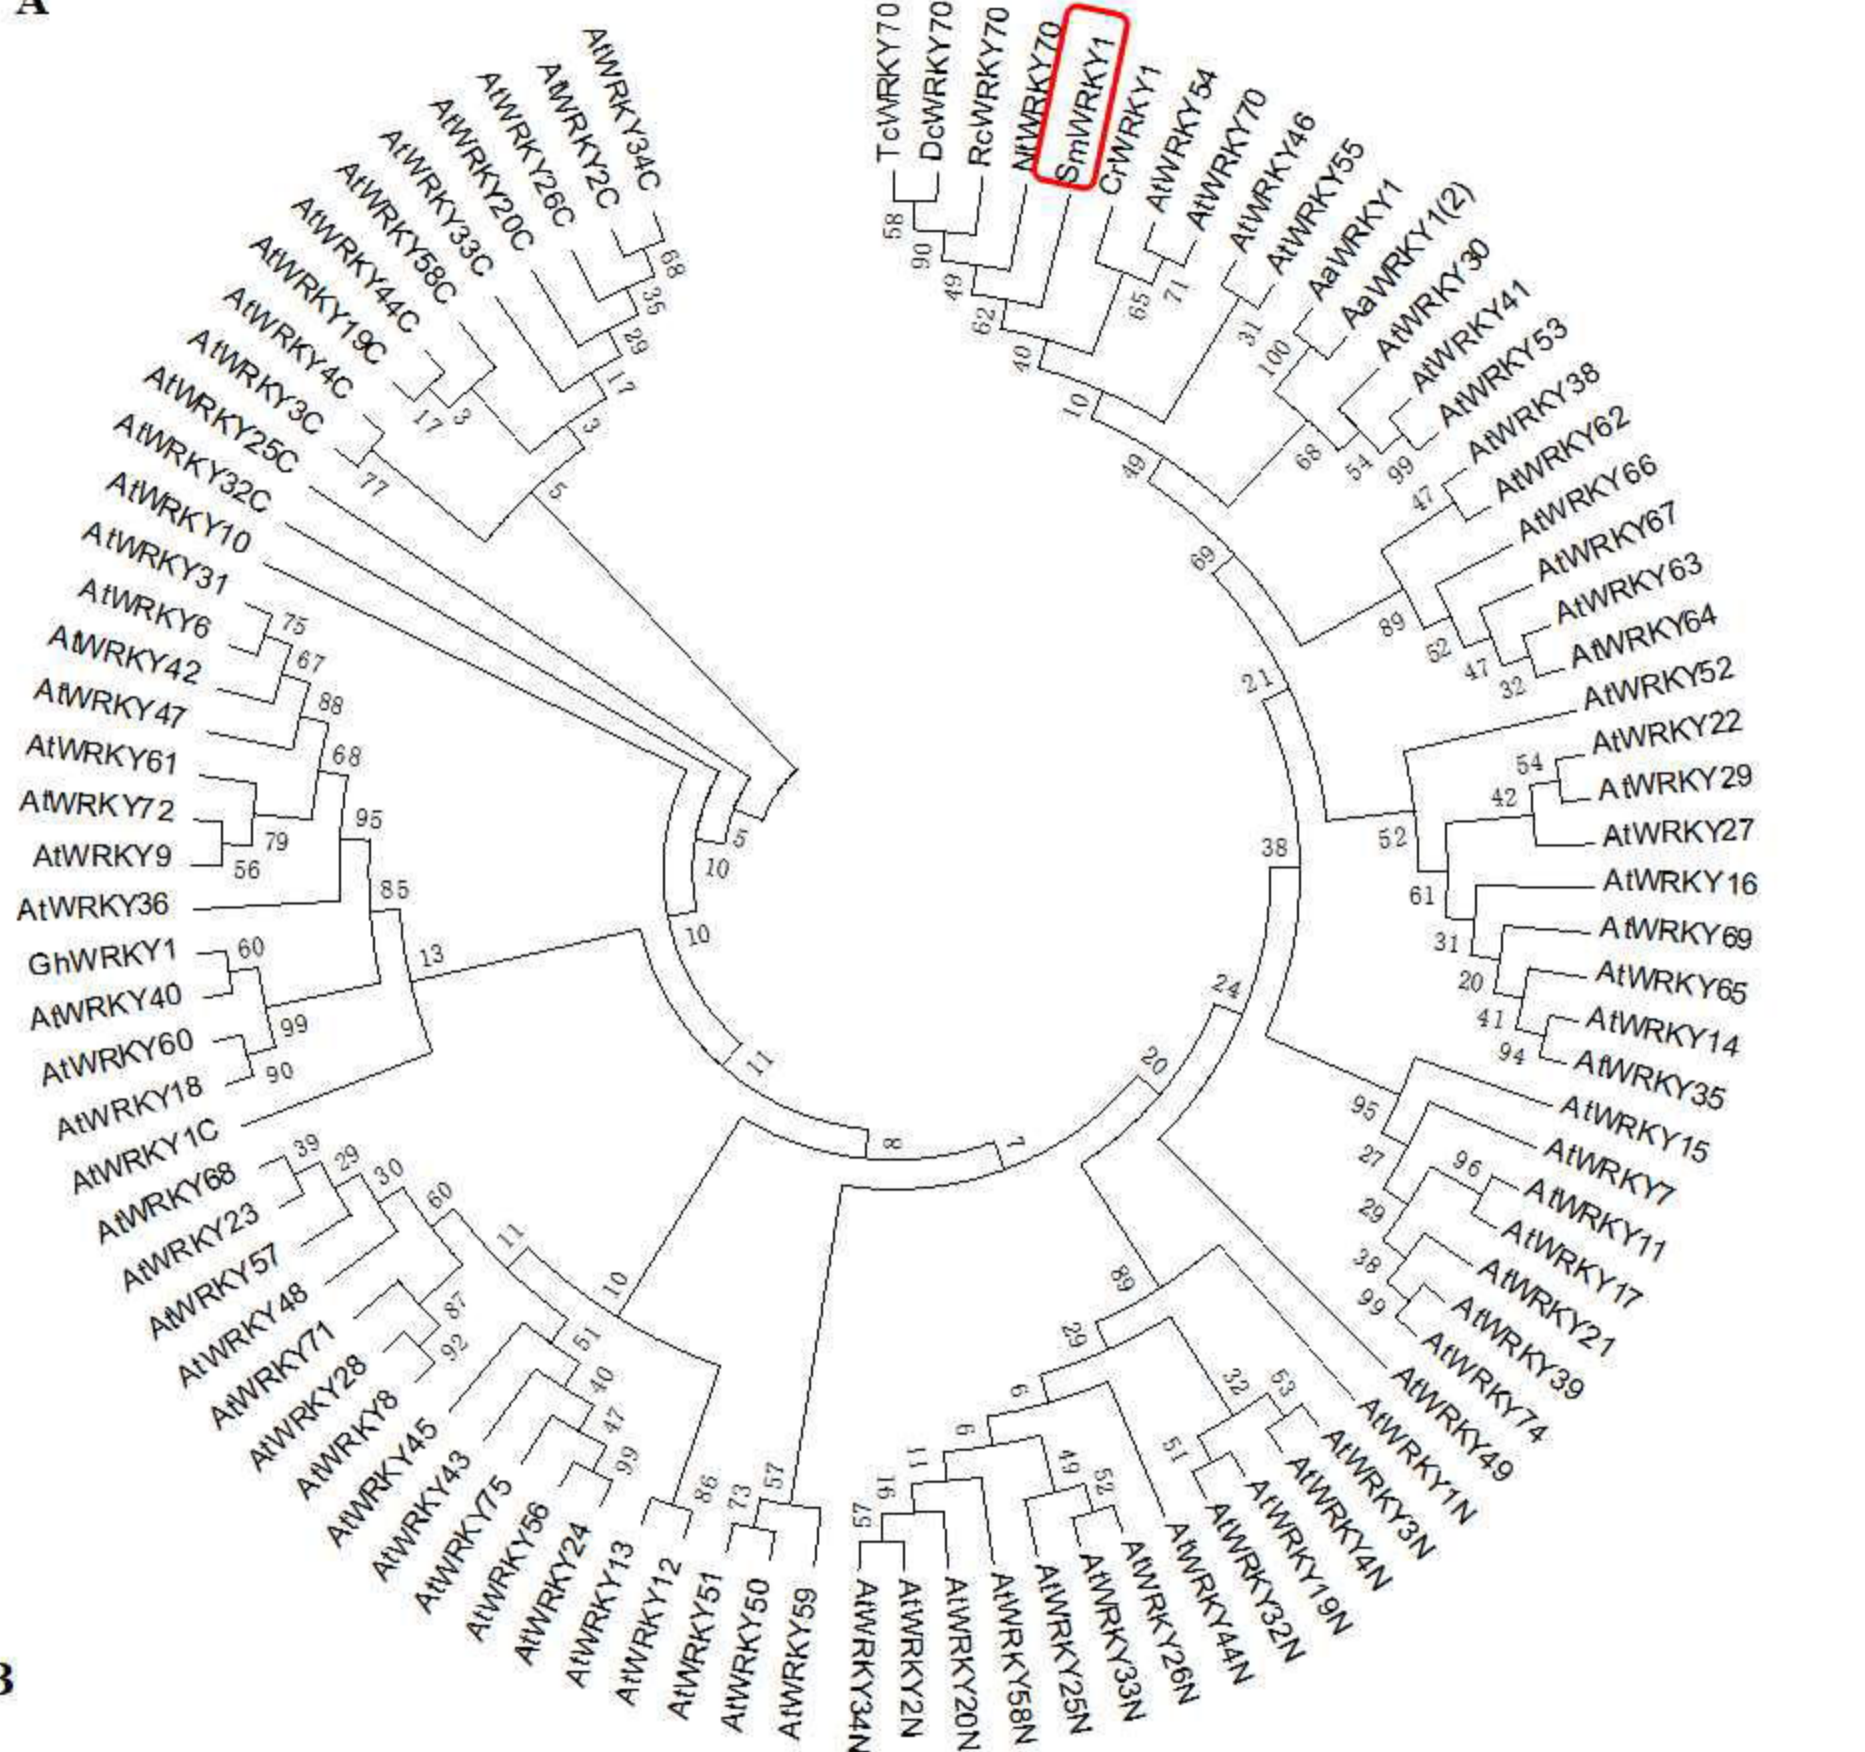

B

|           |       |                                                      |
|-----------|-------|------------------------------------------------------|
| AaWRKY1   | (1)   | --MESVCVYGQKTLINELSQGIQMAKQLKVNLSNP-----             |
| AtWRKY54  | (1)   | MEGRDMLSWEQKTLTSELINGFDAKKLQARLREAPSPSSSFSSPATAVA    |
| CrWRKY1   | (1)   | -----MNTTMAWHDRKKLLEEILLKGKESAT-----                 |
| SmWRKY1   | (1)   | -----                                                |
| GhWRKY1   | (1)   | --MNSSSSSWVDSLDLNASTKSLQLETVPVSHPNSTNSLIVFGRKLSVKE   |
| Consensus | (1)   | Q TL L                                               |
| AaWRKY1   | (34)  | EAREILIQKILASYDNALFVFKSGES-AGQCGPNGFPFASLTESAITIAS   |
| AtWRKY54  | (51)  | ETNEILVKQIVSSYERSLLLLNWSSSPSVQLIPTPTVTVVPVANPGSVPE   |
| CrWRKY1   | (27)  | KLQTLHLHQKPNNSPYDVVSAAEELSVQ-IFRSFTETLAVLGPDDIRQIVAA |
| SmWRKY1   | (1)   | -----                                                |
| GhWRKY1   | (49)  | ESGALMEELNRVNAENKKLTEMLKAMCESYNALQSQLVDLMNKNTTEKELS  |
| Consensus | (51)  | E IL S E L V L S                                     |
| AaWRKY1   | (83)  | PQSVRSEC-----NQPFSE-QGPNVSKKRKGSTICEDQVKM            |
| AtWRKY54  | (101) | PASINGSPRSEEFAD---GGGSSESHHRQDYIFNSKKRKMLPKWSEKVRI   |
| CrWRKY1   | (76)  | DGMARSSS-----SEITDGFIRKKSAGVKYRKG-SYKRRNVSE          |
| SmWRKY1   | (1)   | --MAGDS-----CKTPAAKDRRG-CYKRKRSSSE                   |
| GhWRKY1   | (99)  | PTKKRKSETSNNGNIIGNSESSSTDEEESCKKPREELIKAKISRAYVR     |
| Consensus | (101) | P R S S SK RKG R V                                   |
| AaWRKY1   | (120) | CTDDGLEGSVDDGYSWRKYGQKDILGAKFP-SYYRCTYRKAEEKCLATKQV  |
| AtWRKY54  | (148) | SPERGLEGPQDDVFSWRKYGQKDILGAKFPRSYRCTHRSTQNCWATKQV    |
| CrWRKY1   | (113) | TETKYS-STMEDEYAWRKYGQKDILRSNFPRCYERCTHK-NEGCKATKQV   |
| SmWRKY1   | (26)  | TRIKESDLFEDGHAWRKYGQKSILNAKHPRNYRCAHKFDQKCLATKQV     |
| GhWRKY1   | (149) | TELSDTSLVVKDGYQWRKYGQKVTRDNPCEPRAYFKCSFA--PSCPVKKKV  |
| Consensus | (151) | T K S VDDGYAWRKYGQKDIL AKFPRSYRCTHK C ATKQV          |
| AaWRKY1   | (169) | QRTDANPTVFDITYKGKHTCNHHARLAEPPLPEKHEINTTHHQELPRPNP   |
| AtWRKY54  | (198) | QRSDGDATVFEVYRGTHHTCS-QAITRTPPLASPEKRQDTRVKPAITQKP   |
| CrWRKY1   | (161) | QIVTKNPLMYQTTYFGQHTCNDHLLMRAPHHDIIQEISSDPMDSCLLSFQ   |
| SmWRKY1   | (76)  | QKIQDEPPLYRTTYNGQHTCNKSALHHHVVPASPDSSSVMSFNSIKQEE    |
| GhWRKY1   | (197) | QRSVDDQSVLVATYEGEHNLPPSQIEATSGSS--RLGSVPVGSTPVKSS    |
| Consensus | (201) | QRS DPTVF TY G HTC N ALI P AS I S V I                |
| AaWRKY1   | (219) | GGMLSNLRANLTVNTSDFGATDPYSFSFPLEPFGTIEDYQQQLHLPNDFDD  |
| AtWRKY54  | (247) | KDILESLSKSNLTVRTDGLDDGKDVFSFPDTP-----P-FYNYGTING     |
| CrWRKY1   | (211) | -----TTVNNIPSSS--SNNQAIKPLP-----KQVIVAVTKEDSDD       |
| SmWRKY1   | (126) | -----EIQMKTPDEYYISPHHFSPMSS-----DVYSCSHSIEDVDD       |
| GhWRKY1   | (245) | GPTITLDTLNSIKSSDEARNSKPKLDSPEATQYLVEHMASSLTKDPNFTA   |
| Consensus | (251) | L NL V T D P SP H D DD                               |
| AaWRKY1   | (269) | ELLQVYSPPVISPGTSDLNICYTDWDSSQSLNFTADLDLDFKF          |
| AtWRKY54  | (288) | EFGHVESPIFDVVDWFNPTVEIDTTFFAFLHESIYY-----            |
| CrWRKY1   | (245) | FSSDGKSLPSHSTLL-----                                 |
| SmWRKY1   | (162) | IVGSFEDYFEFETLS-----                                 |
| GhWRKY1   | (295) | ALAAAIISGRMFSTNSN-----                               |
| Consensus | (301) | LG S PIFSTLS                                         |

**A**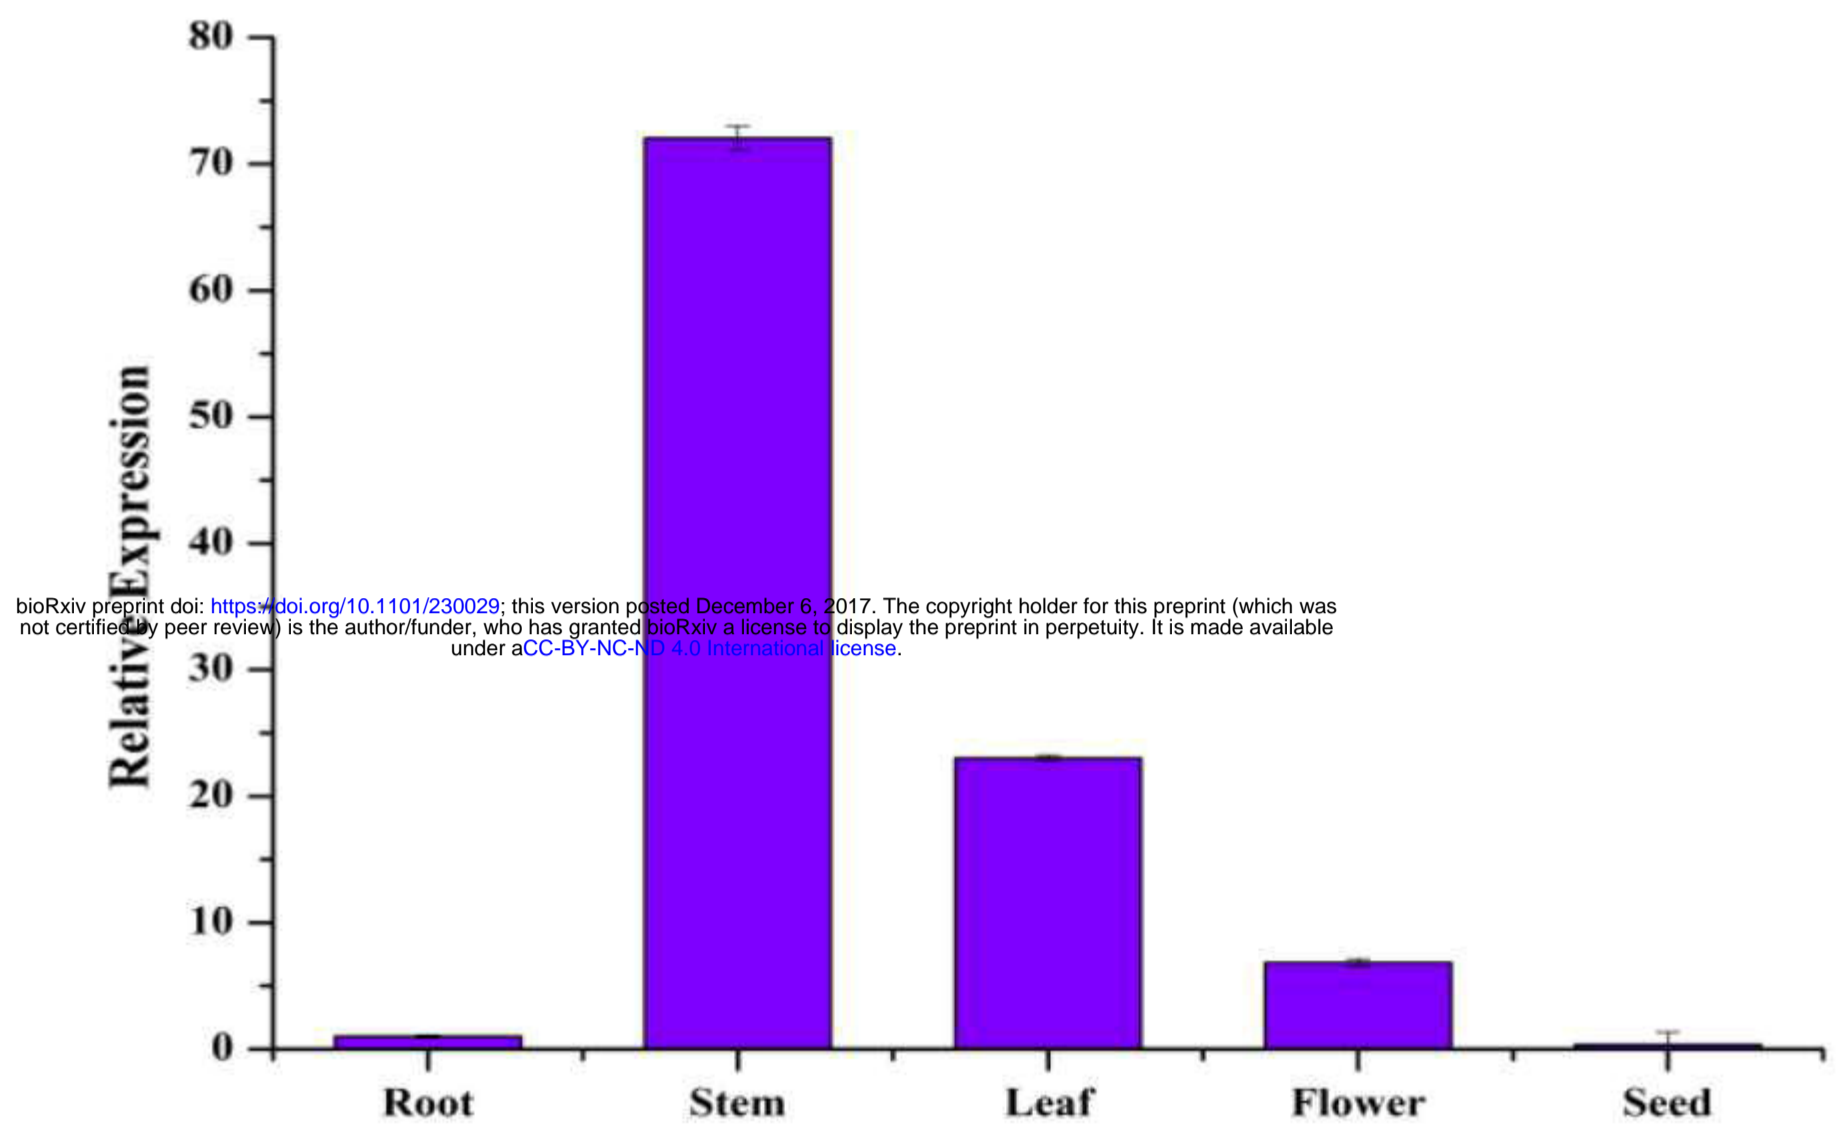

bioRxiv preprint doi: <https://doi.org/10.1101/230029>; this version posted December 6, 2017. The copyright holder for this preprint (which was not certified by peer review) is the author/funder, who has granted bioRxiv a license to display the preprint in perpetuity. It is made available under aCC-BY-NC-ND 4.0 International license.

**B**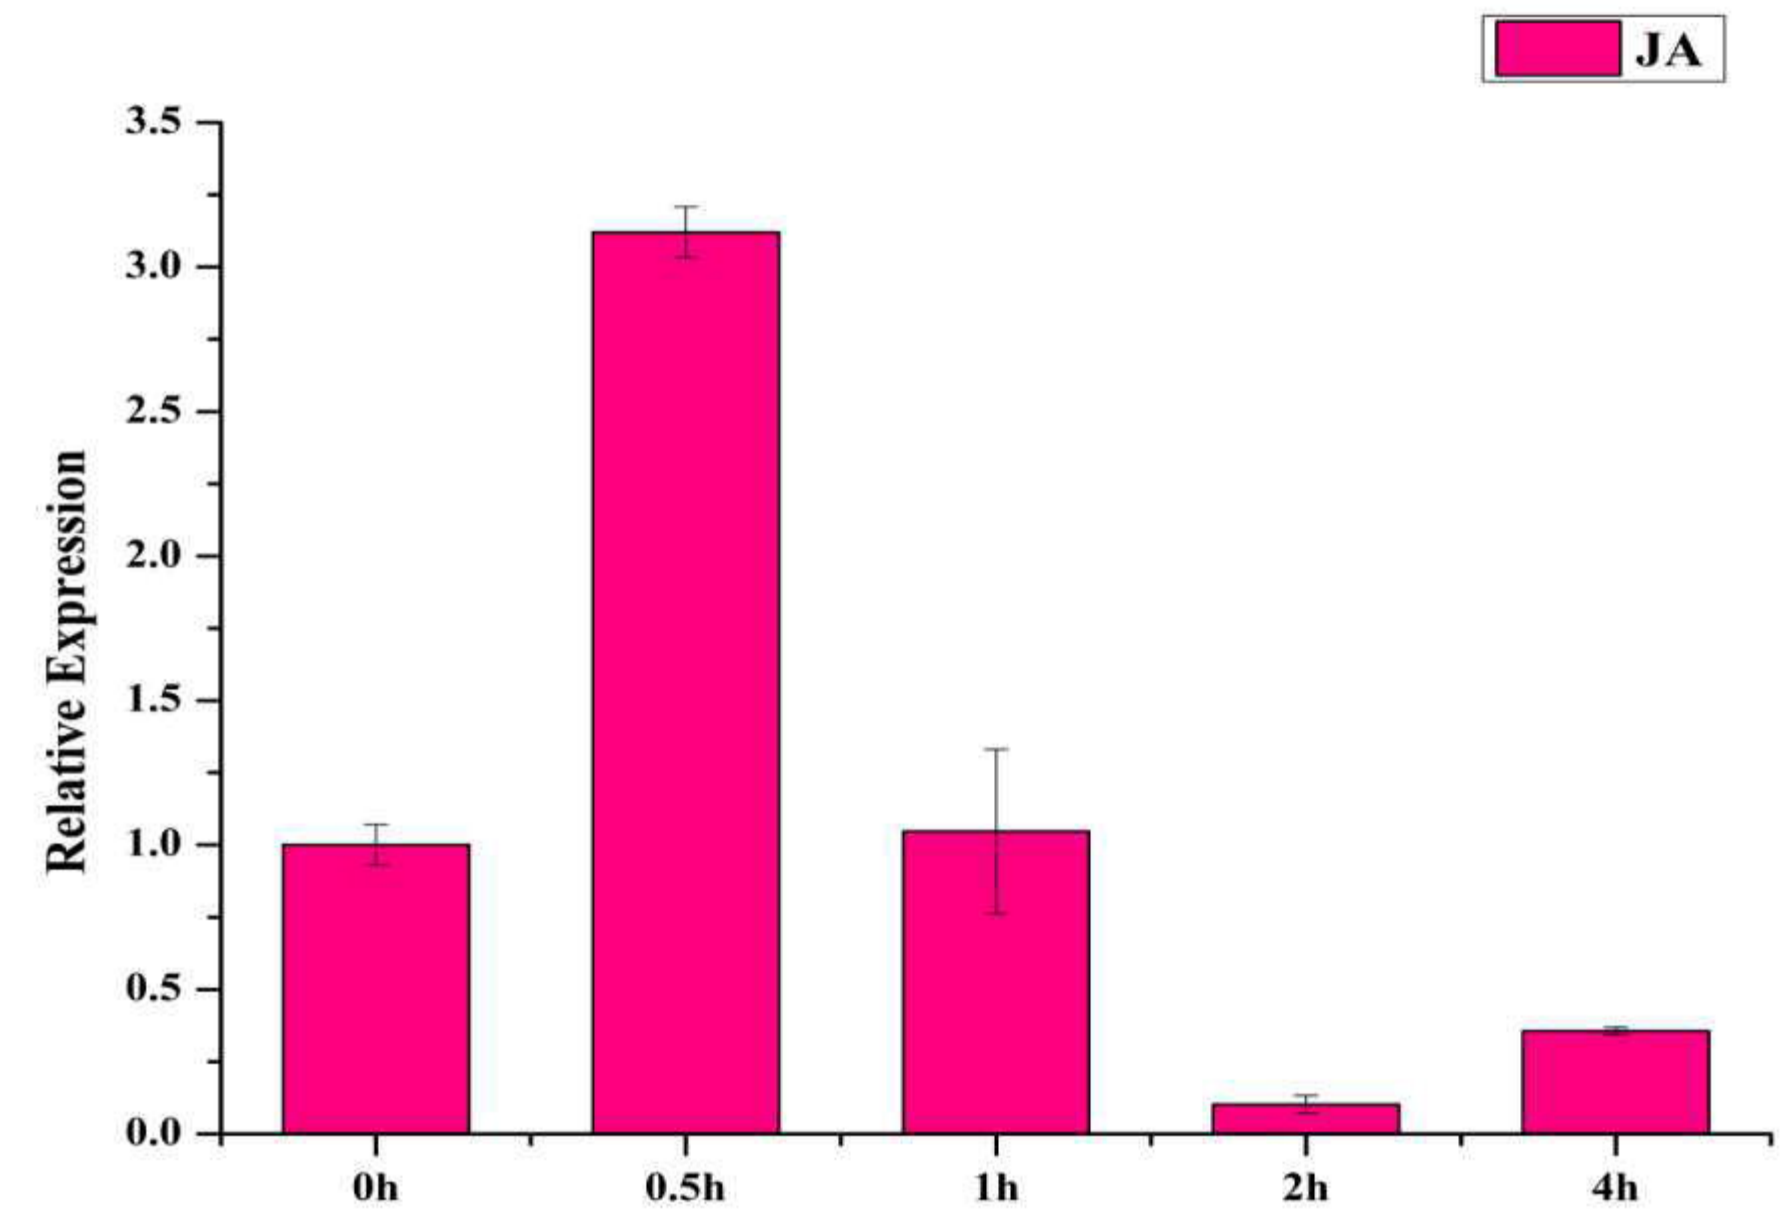**C**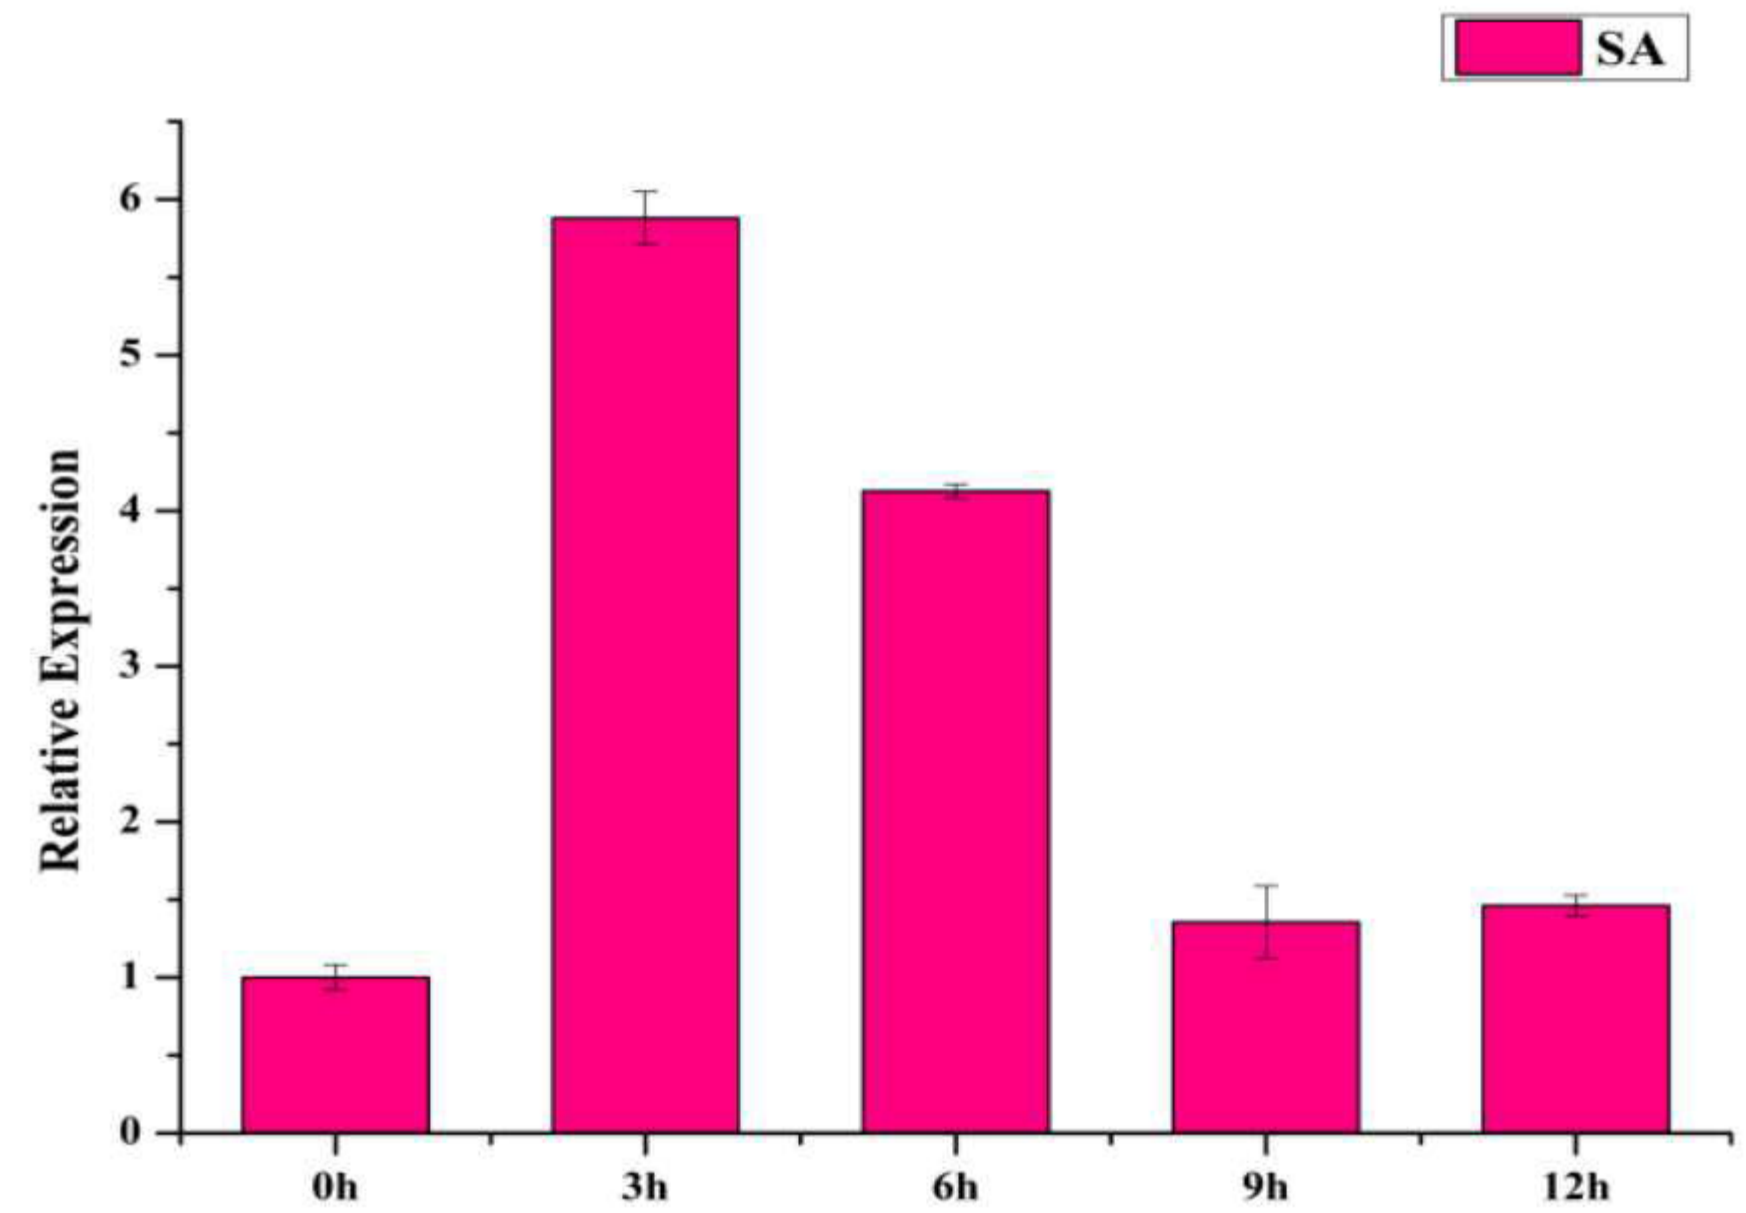**D**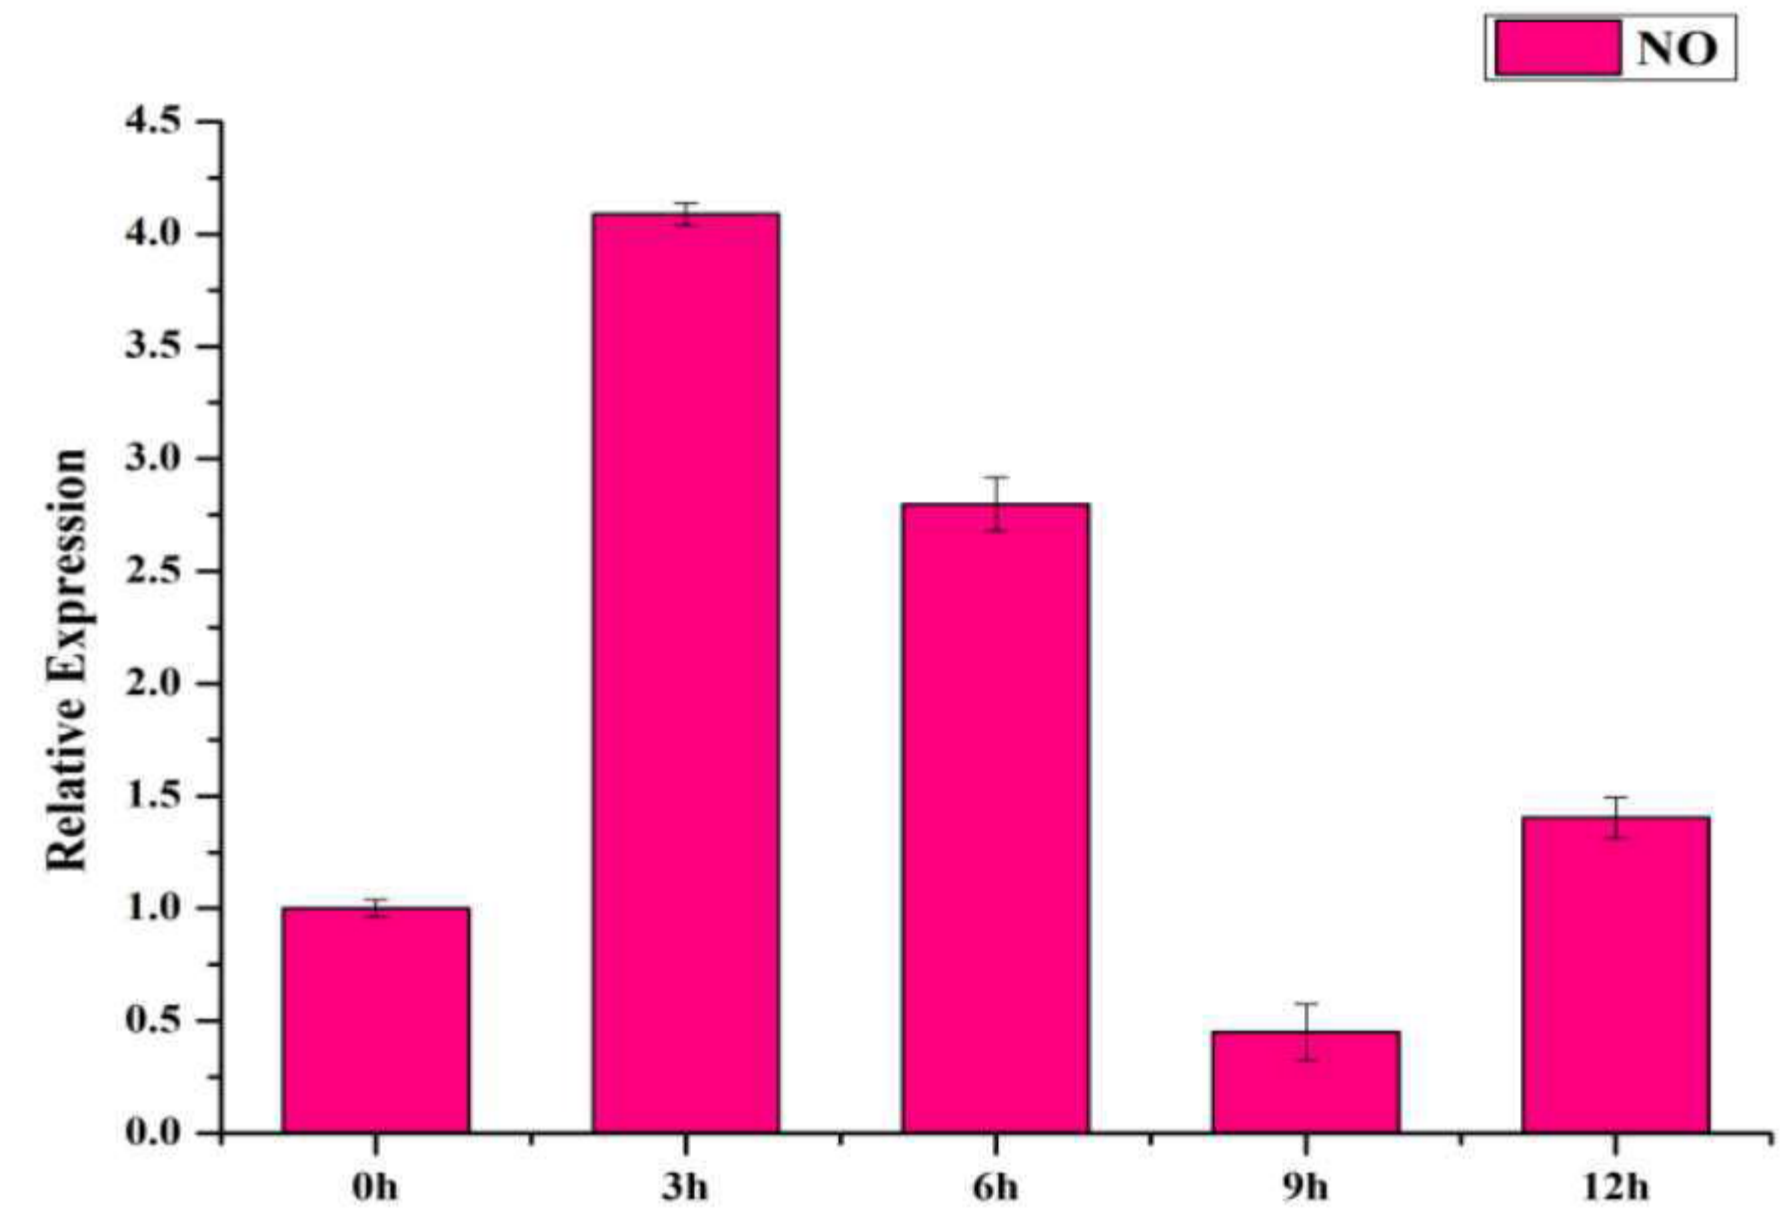

**Red**

**Green**

**Bright Field**

**Merged**

**GFP**

**SmWRKY1:GFP**

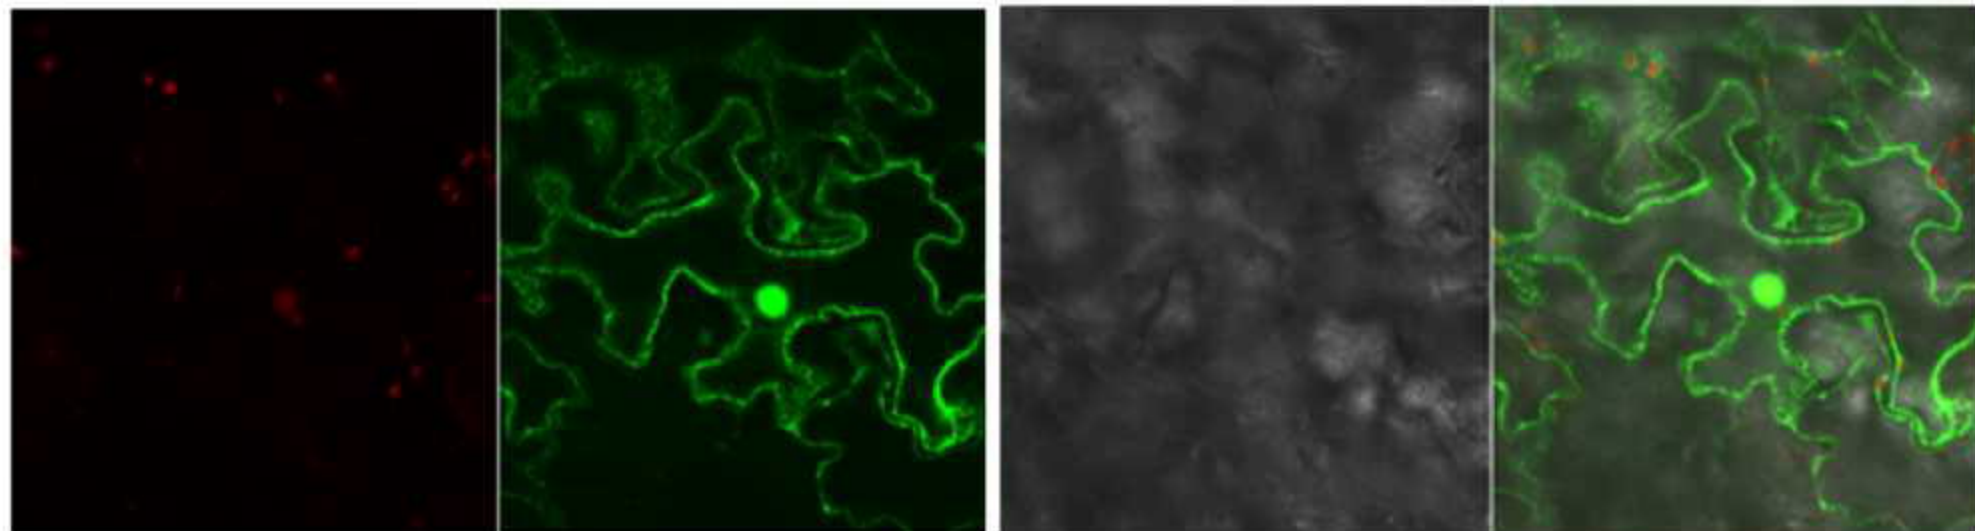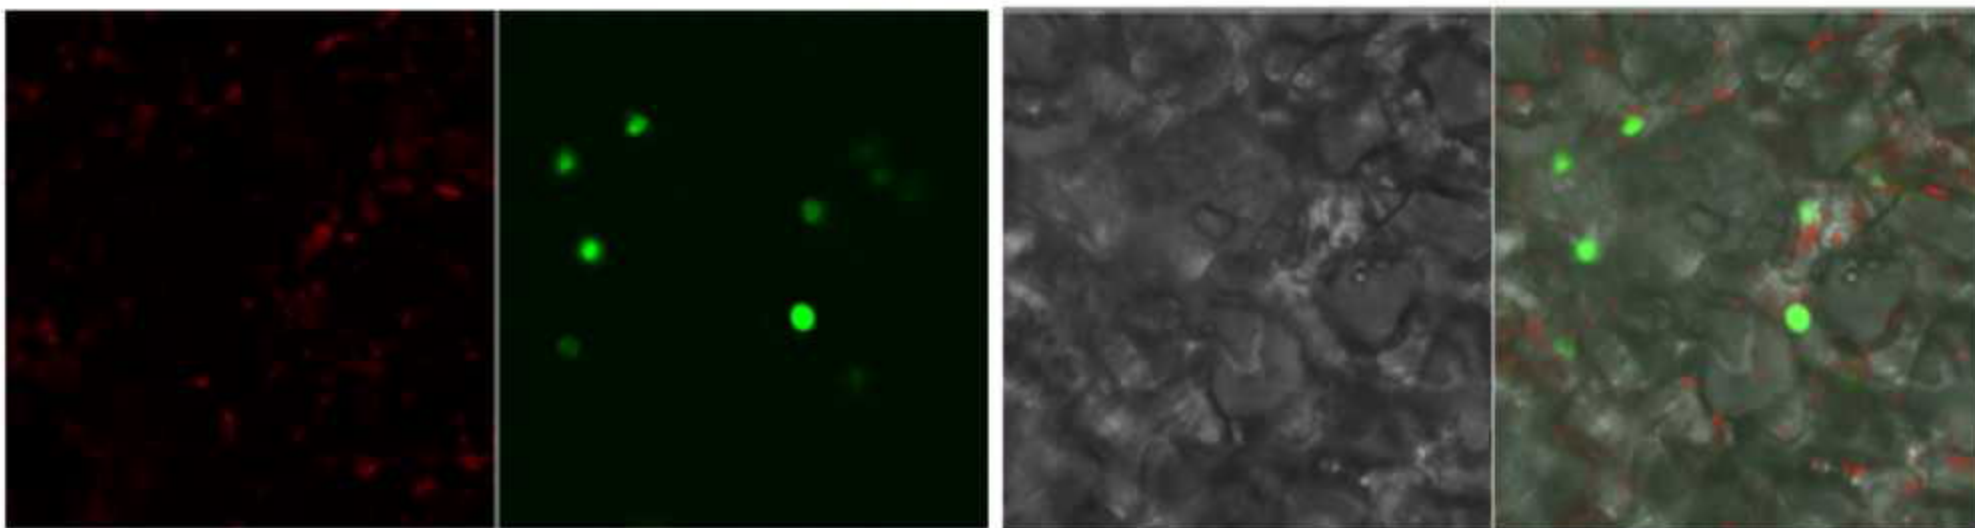

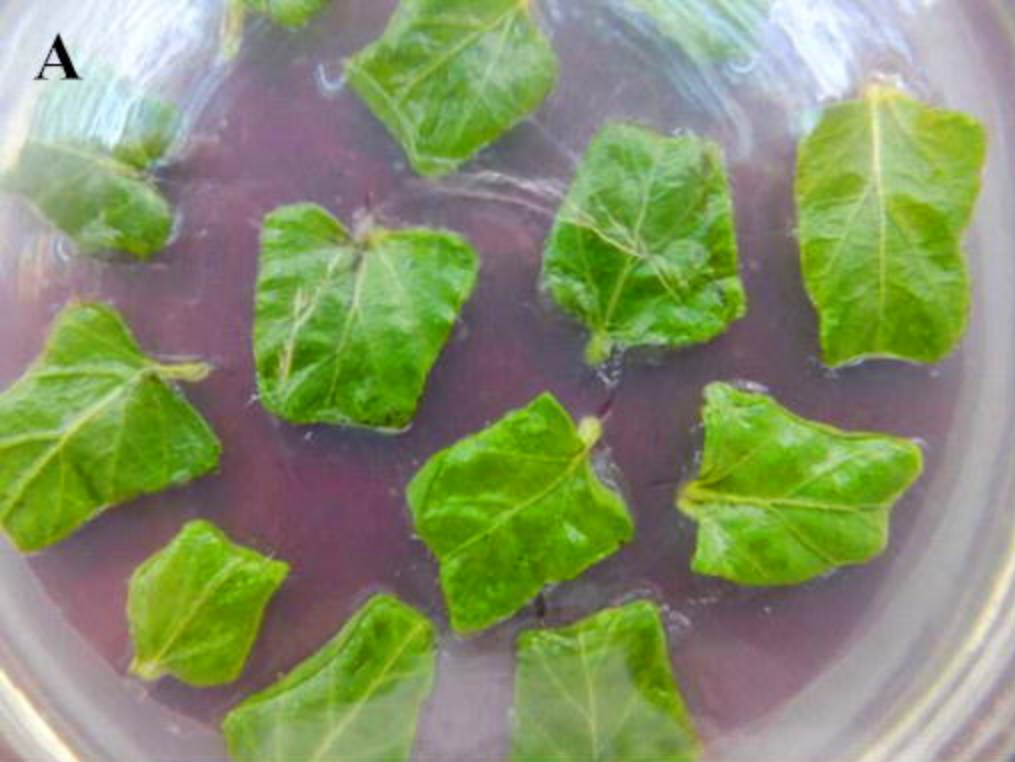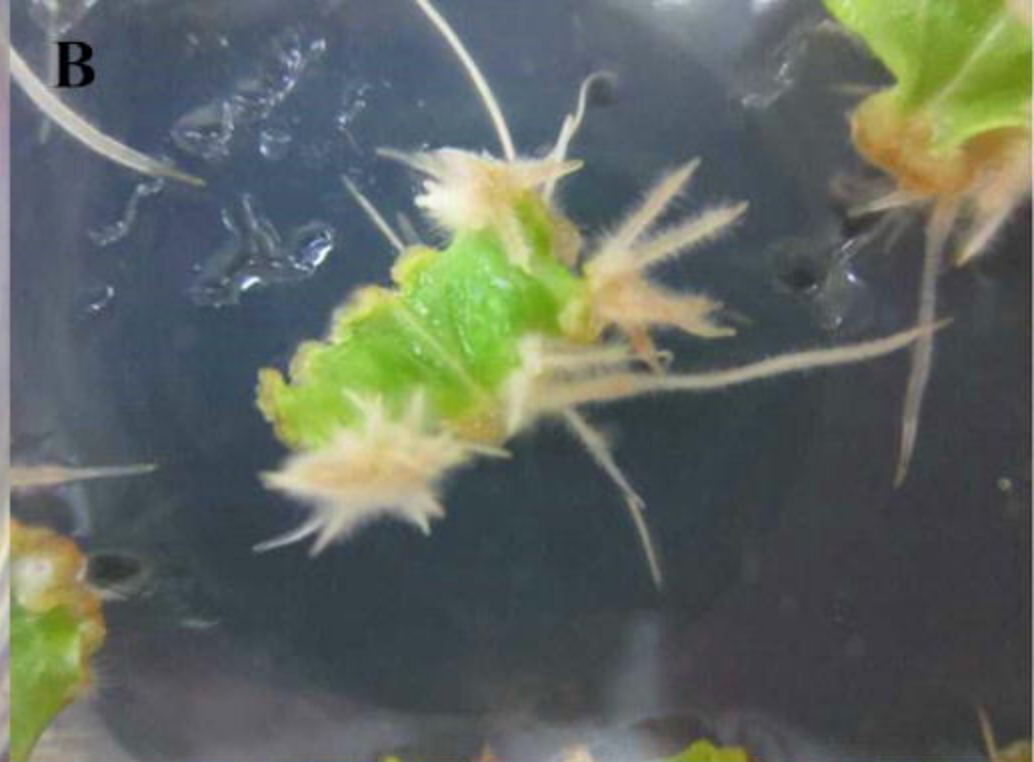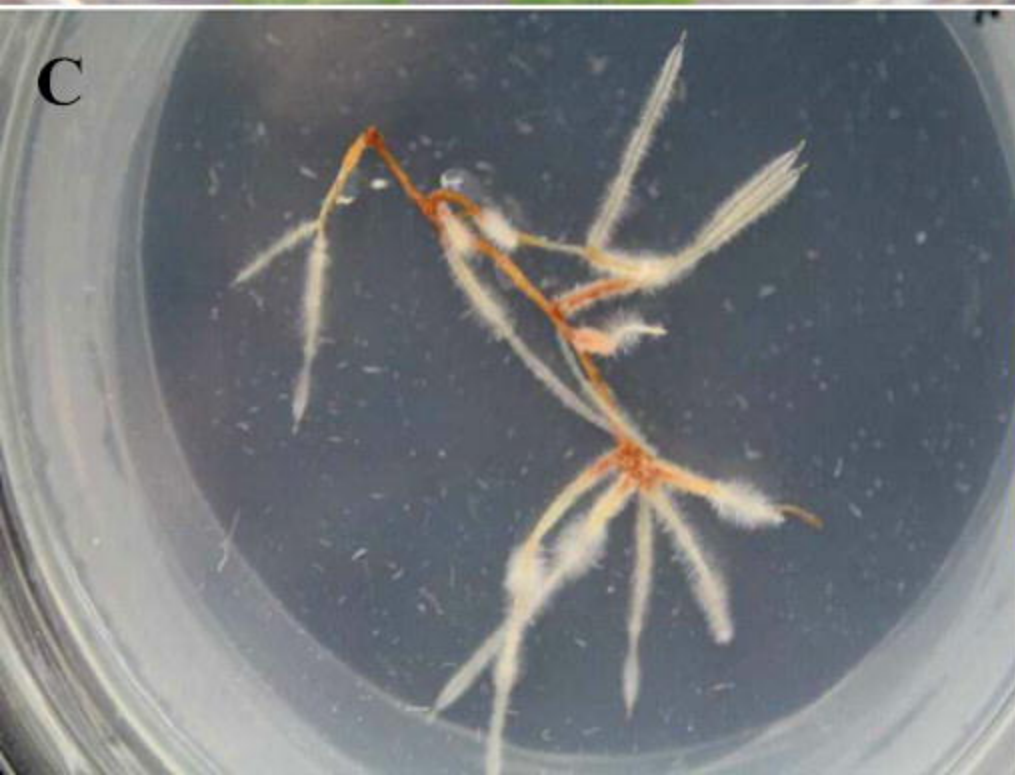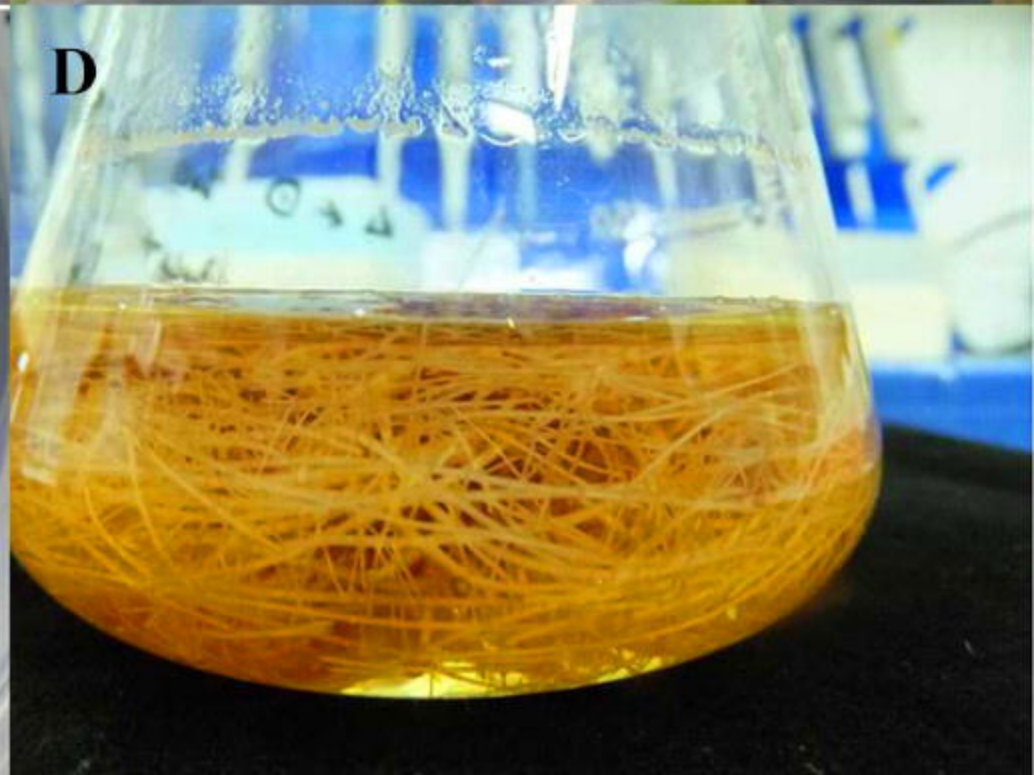

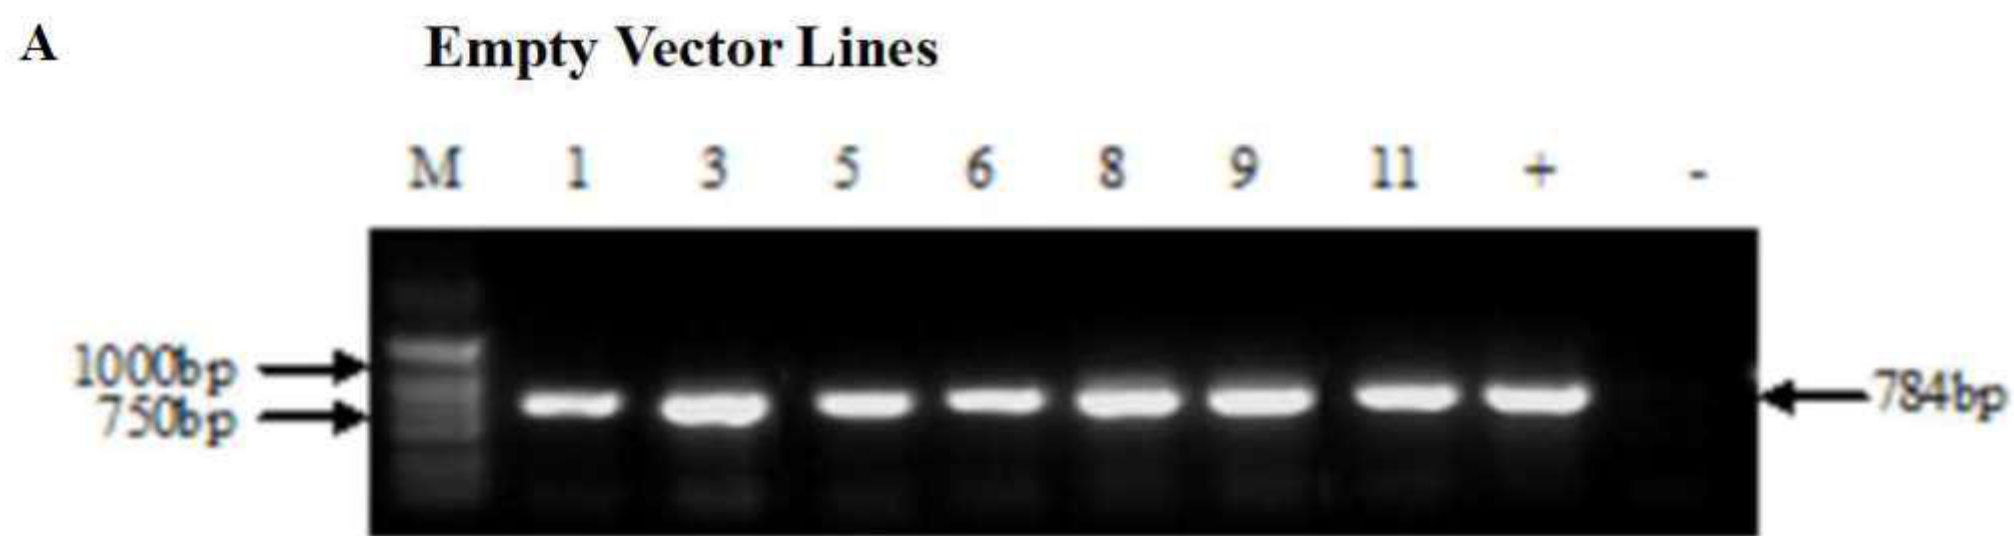

***SmWRKY1 OX* lines**

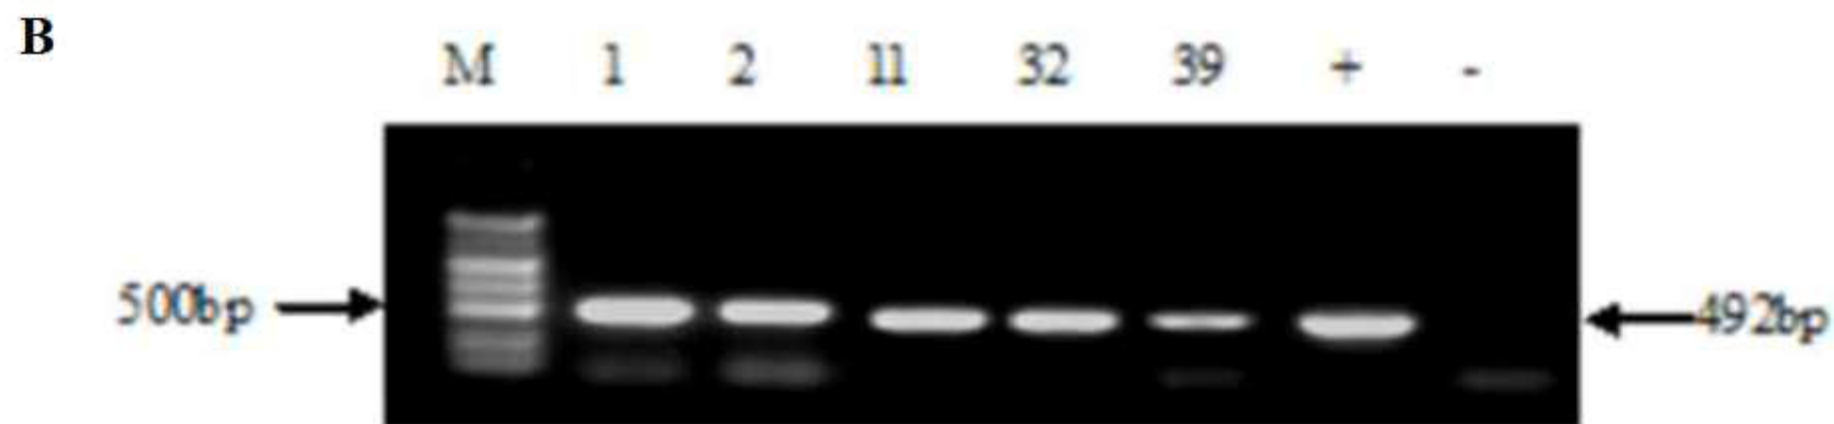

**A**

bioRxiv preprint doi: <https://doi.org/10.1101/230029>; this version posted December 6, 2017. The copyright holder for this preprint (which was not certified by peer review) is the author/funder, who has granted bioRxiv a license to display the preprint in perpetuity. It is made available under aCC-BY-NC-ND 4.0 International license.

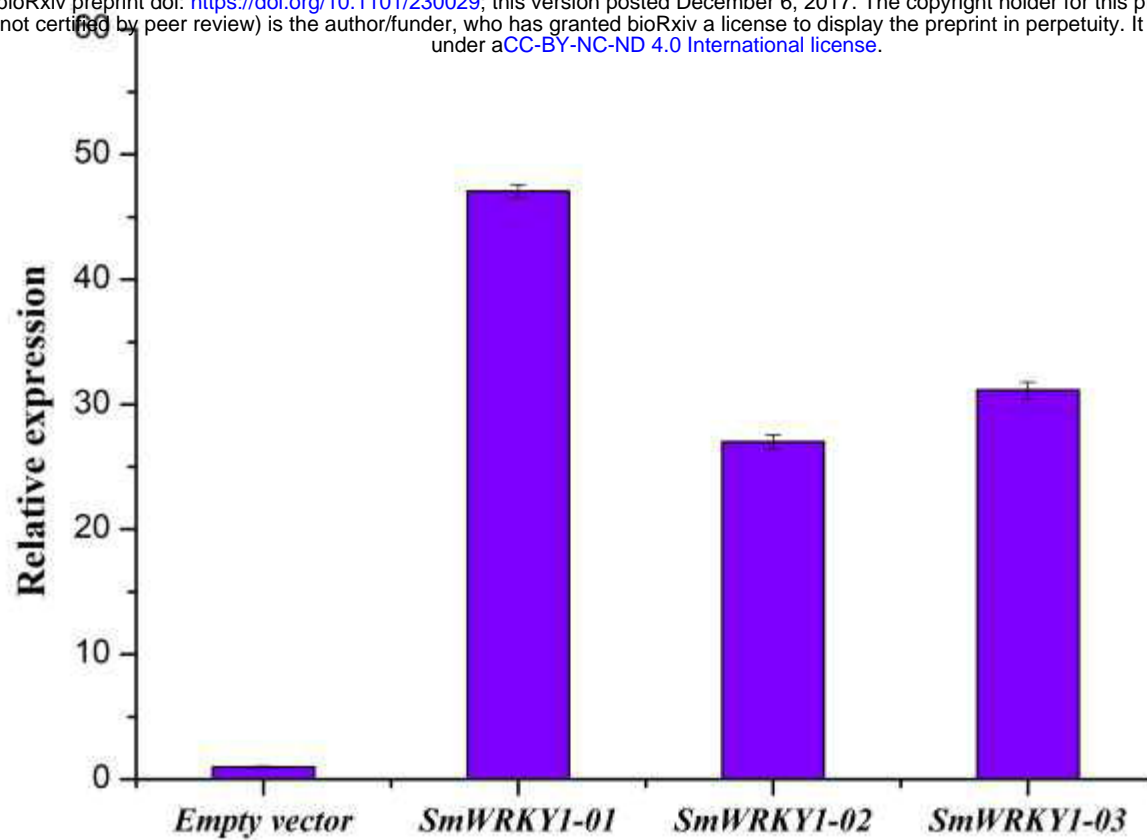**B**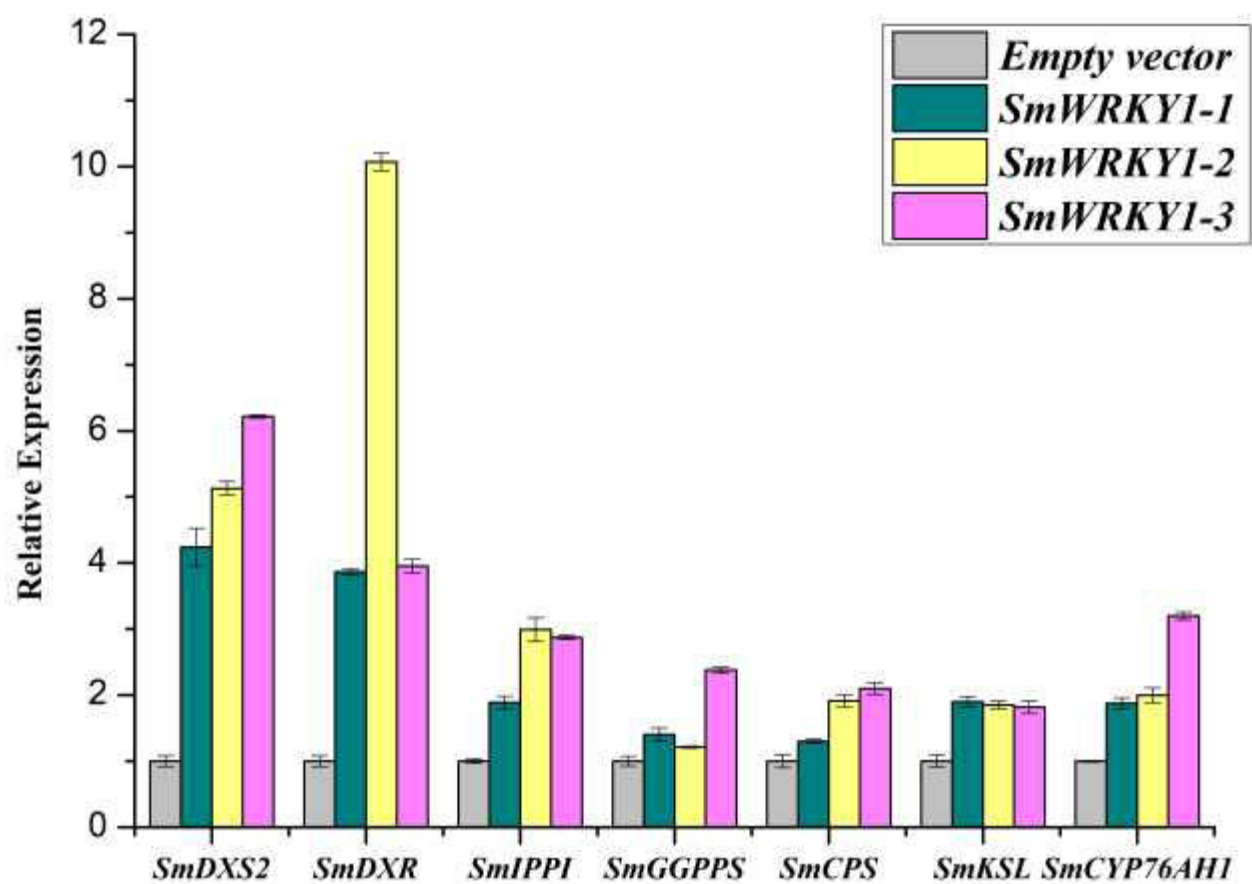

**A**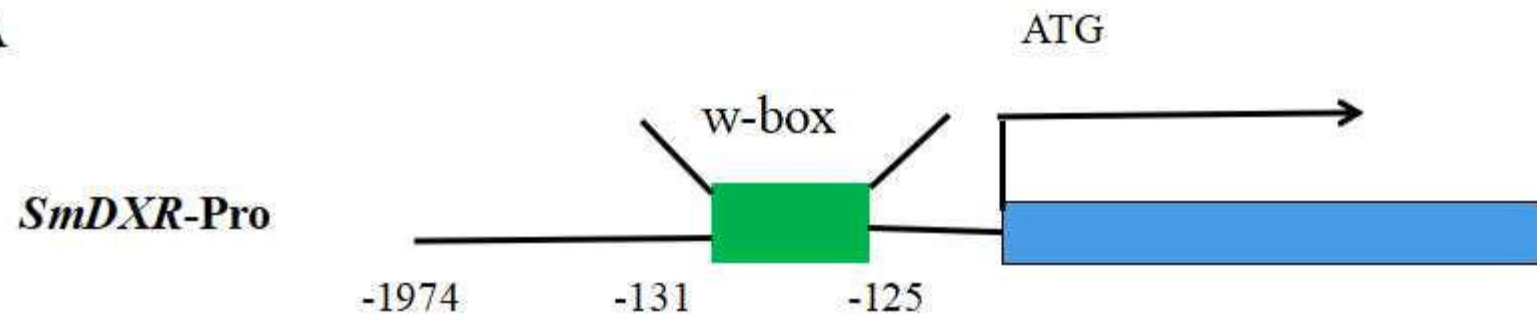**B**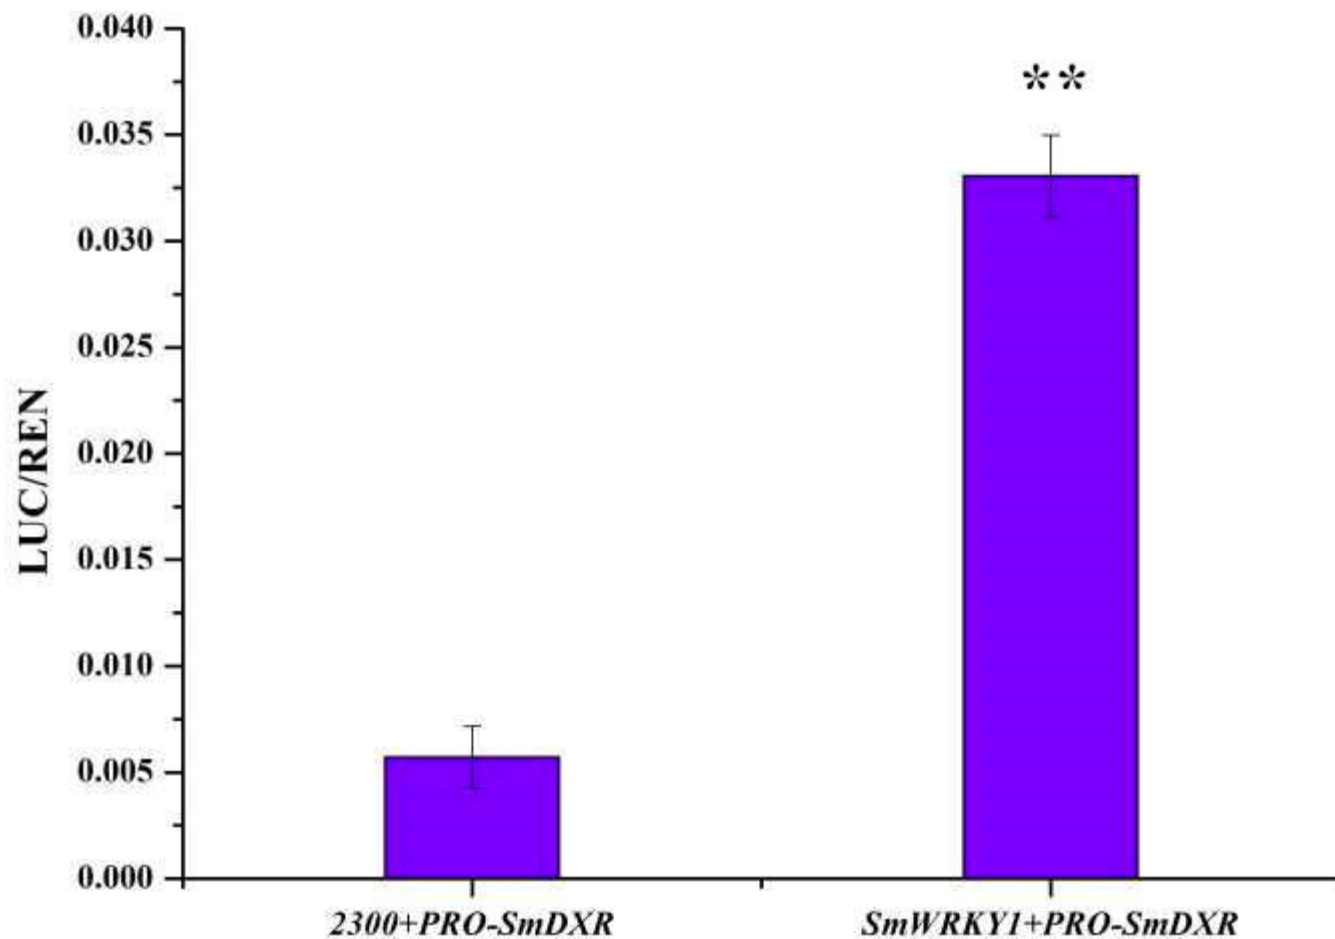

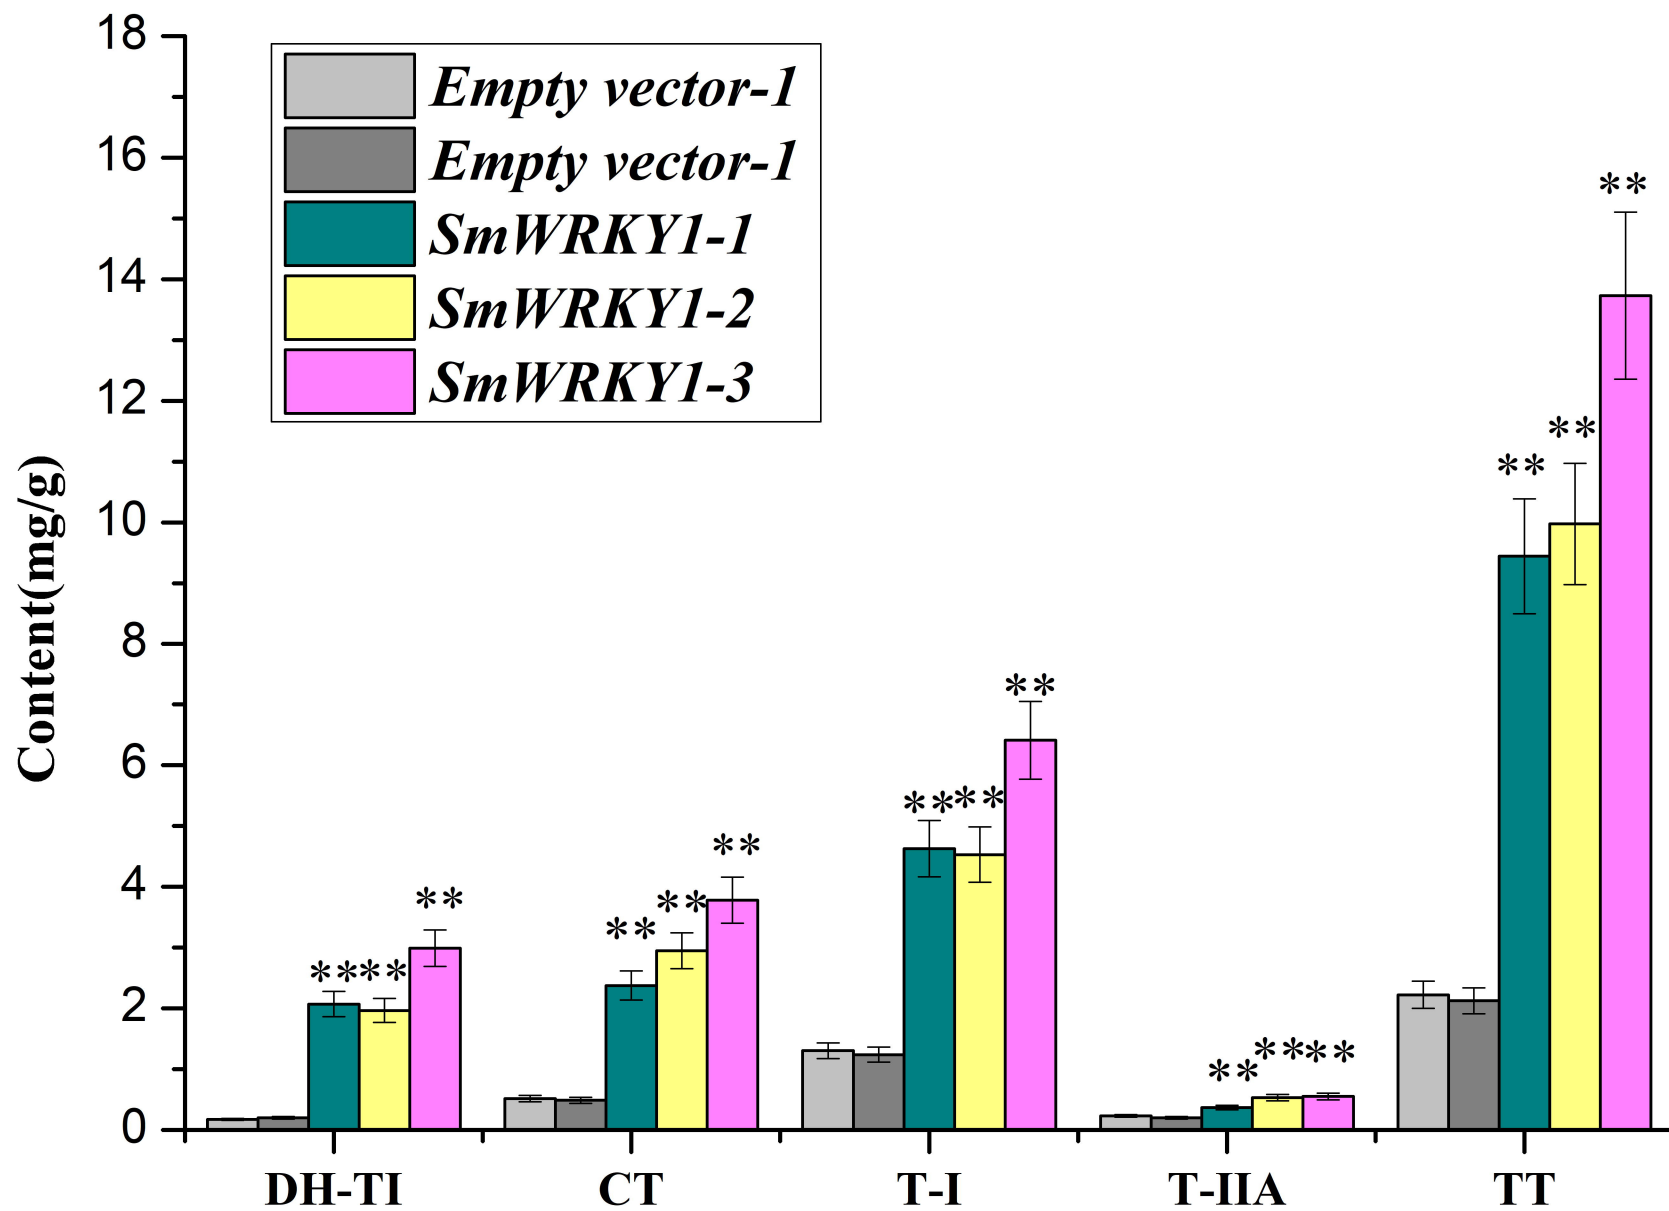

Source: https://www.biorxiv.org/content/10.1101/230029v1.full.pdf
